# Supplementary material for: CELF1 is a central node in post-transcriptional regulatory programmes underlying EMT
Source: PubMed Central journal article supplement (PMC5121338; doi:10.1038/ncomms13362), 2016-11-21
Supplement: ncomms13362-s1.pdf [file ncomms13362-s1.pdf]

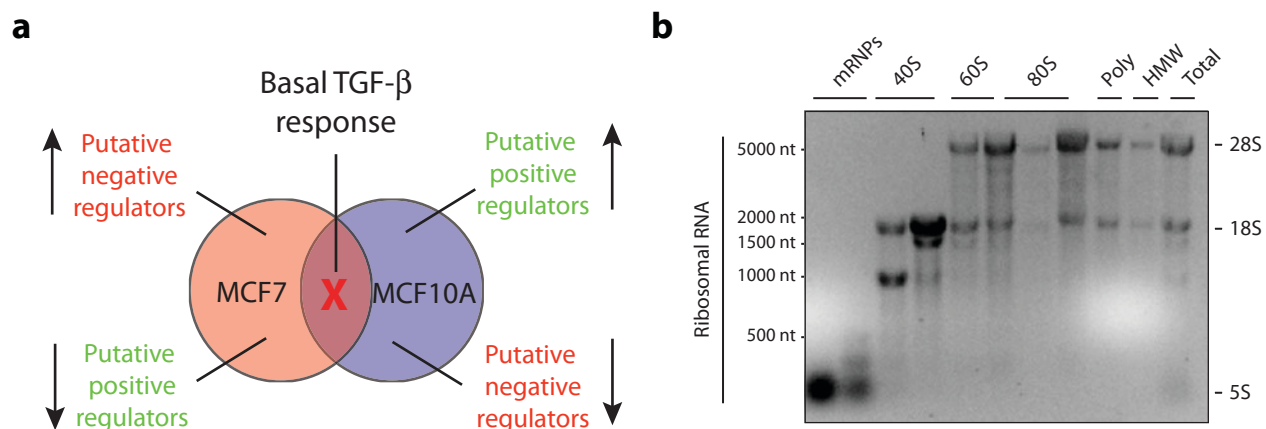

**Supplementary Figure 1. Profiling and Isolation of Polysomal Fractions from MCF10A and MCF7 cells.** (a) Rationale for polysomal profiling in both MCF10A cells, which are responsive to TGF- $\beta$ , and MCF7 cells, which are not. The TGF- $\beta$  signaling pathway is intact in both cell lines. (b) Representative ribosomal RNA profile of different fractions visualized by denaturing agarose gel to confirm fractionation fidelity. S = Svedberg unit; Poly = pooled polysomal fractions; HMW = high molecular weight fractions. Images is representative of a minimum of three individual experimental replicates.

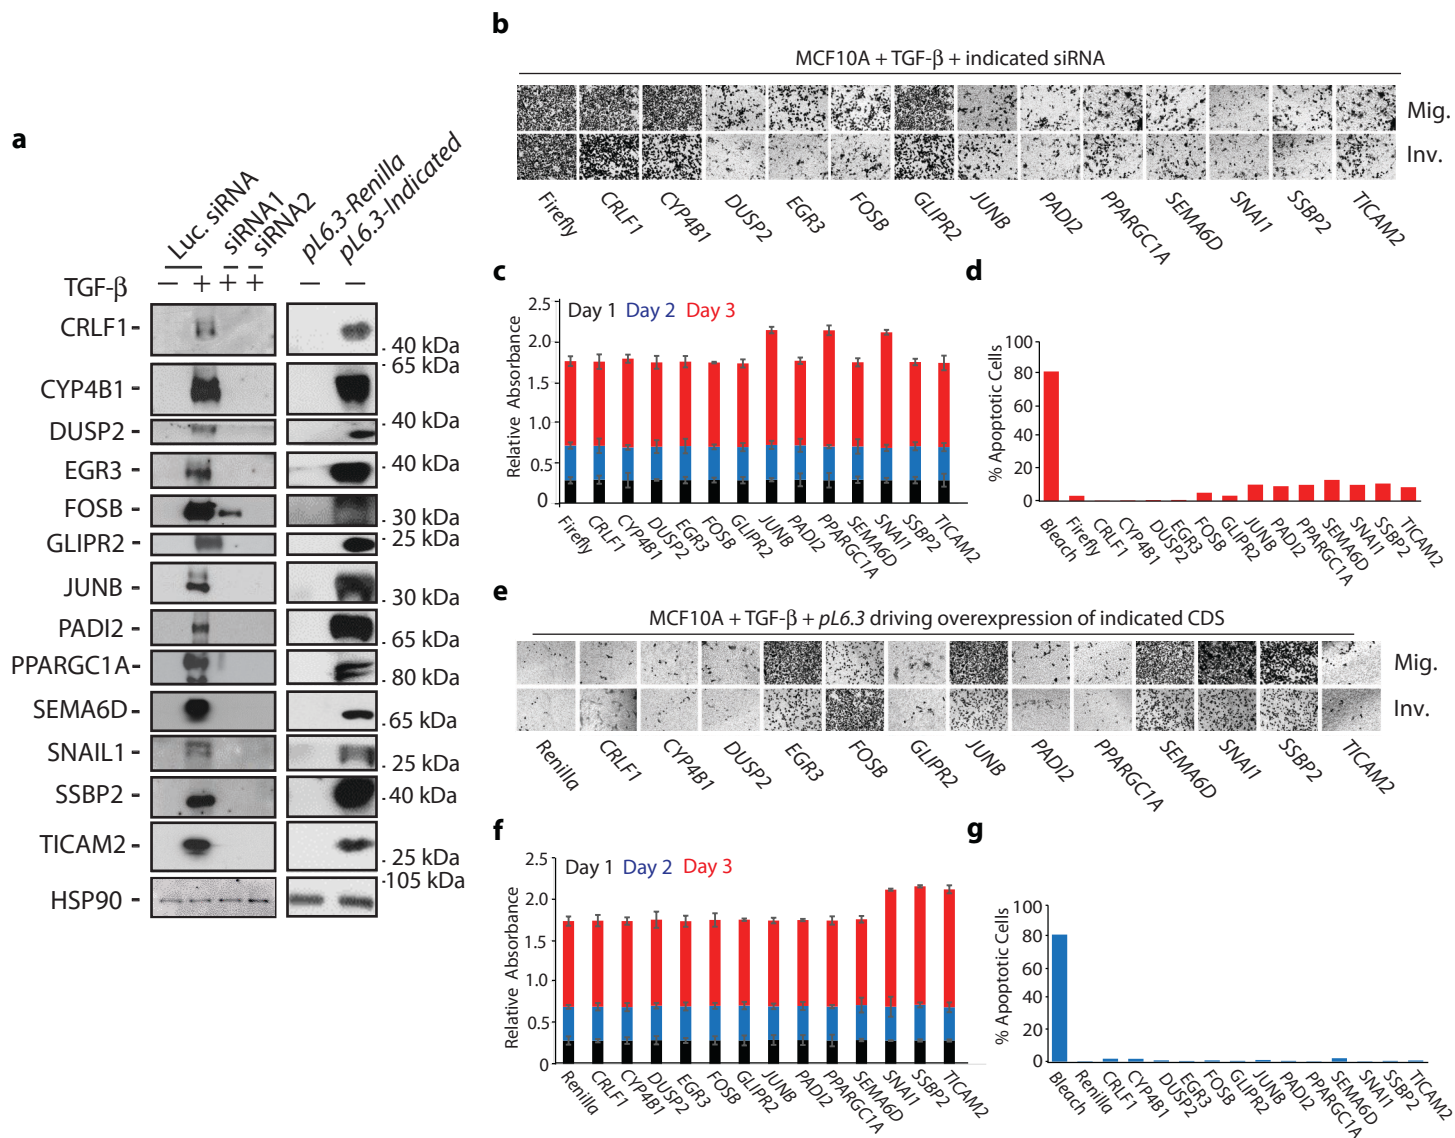

**Supplementary Figure 2. Effective Knockdown and Overexpression of GRE-containing Transcripts Impacts MCF10A Migration and Invasion but has Largely Negligible Effects on Viability and Proliferation.** (a) Representative analysis of protein levels in MCF10A cells transiently transfected with siRNAs targeting *Firefly* Luciferase or indicated gene products (*left*), or transduced with *pL6.3-Renilla* Luciferase or *pL6.3*-indicated genes (*right*). Each blot was probed for HSP90 to confirm equal loading - a representative blot is shown. (b) Representative crystal violet-stained images of migratory (*Mig.*) and invasive (*Inv.*) cells transfected with the indicated siRNAs. (c) Cell proliferation was evaluated via MTT assays over the course of three days in cells transfected with the indicated siRNAs. Absorbance of culture medium at 570 nm is shown. (d) Cell viability in cells transfected with the indicated siRNAs was assessed via Annexin V/PI staining. As a positive control, apoptosis/cell death was induced in non-manipulated cell by adding bleach to culture medium at a final concentration of 0.1% for 10 minutes. (e) Representative crystal violet-stained images of migratory (*Mig.*) and invasive (*Inv.*) cells transfected with the indicated overexpression constructs. (f) Cell proliferation was evaluated via MTT assays over the course of three days in cells transfected with the indicated overexpression constructs. Absorbance of culture medium at 570 nm is shown. (g) Cell viability in cells transfected with the indicated overexpression constructs was assessed via Annexin V/PI staining. As a positive control, apoptosis/cell death was induced in non-manipulated cell by adding bleach to culture medium at a final concentration of 0.1% for 10 minutes. All panels are representative of a minimum three independent experimental replicates. Error bars depict standard deviation of the mean (SD). Full scans of blots are shown in **Supplementary Figure 9**.

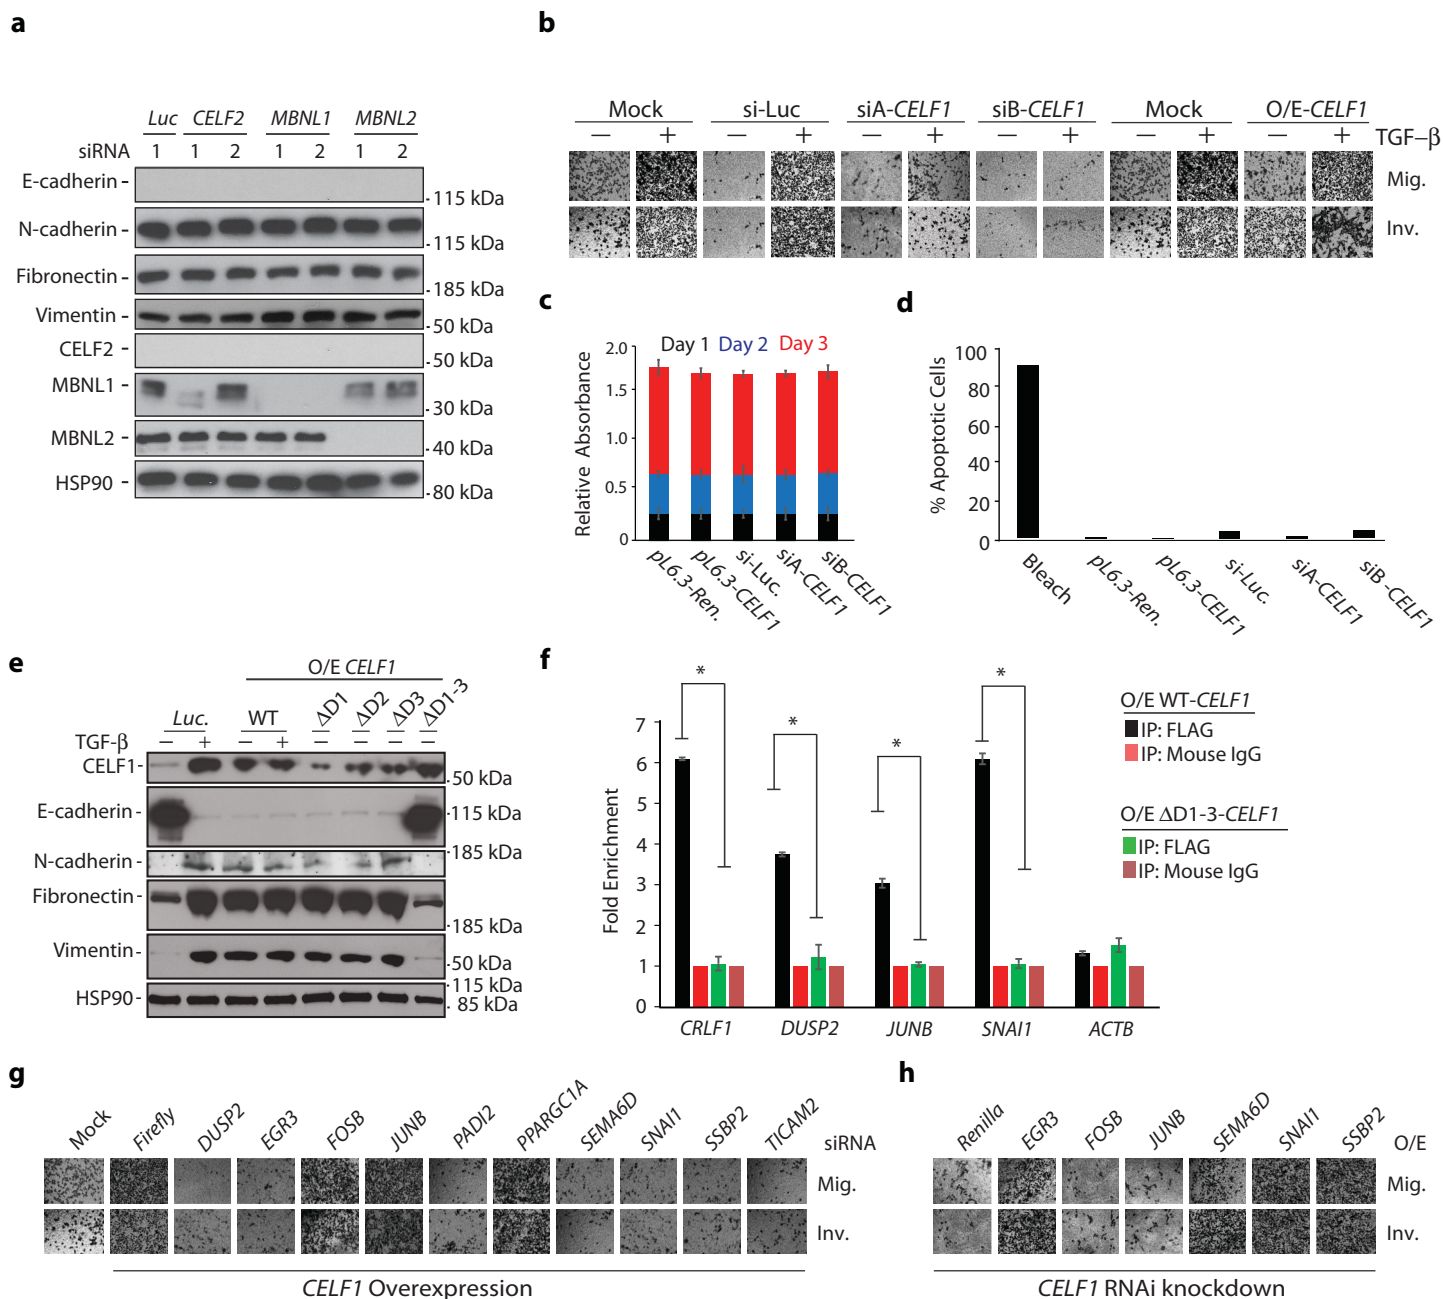

**Supplementary Figure 3. CELF1 is Necessary for and Sufficient to Drive EMT in MCF10A cells, Sufficiency Requires CELF1 RNA-Binding Activity, and Genetic Ordering of CELF1 and GRE-containing EMT Effectors.** (a) RNAi-mediated silencing of *CELF2*, *MBNL1*, or *MBNL2* does not inhibit TGF- $\beta$  induced EMT in MCF10A cells, as assessed by failure to prevent gain and loss of mesenchymal and epithelial cell markers, respectively. (b) *In vitro* migration (*Mig.*) and invasion (*Inv.*), (c) cell proliferation, and (d) viability was evaluated in indicated transfectants/transductants, respectively. (e) Immunoblot analysis of indicated epithelial and mesenchymal cell markers in untreated or TGF- $\beta$  treated MCF10A cells transiently transfected with the indicated overexpression constructs. For the experiments depicted in (a) and (e), data depicts results from a single representative experiment in which extracts were loaded to gels that were processed in parallel. Each blot was probed for HSP90 to confirm equal loading - a representative blot is shown. (f) RNA crosslinking-immunoprecipitation/qRT-PCR of GRE-containing mRNAs from untreated MCF10A cells transfected with either wild-type (WT) or RNA-binding mutant ( $\Delta$ D1-3) *CELF1* using anti-FLAG antibody or mouse IgG. *ACTB* is a non-GRE containing negative control. (g and h) Representative crystal violet-stained images of migratory (*Mig.*) and invasive (*Inv.*) cells transfected with the indicated siRNAs or overexpression constructs. All panels are representative of a minimum of three independent experimental replicates except for panels e and f, which are representative of two independent experiments. For immunoblots depicted, samples were derived from the same experiment and gels were processed in parallel. In panels c and d, error bars represent standard deviation (SD) of the mean. In panel f, error bars represent standard error (SEM) of the mean. \* =  $p$ val  $\leq$  0.05 (Student's t-test). Full scans of blots are shown in **Supplementary Figure 10**.

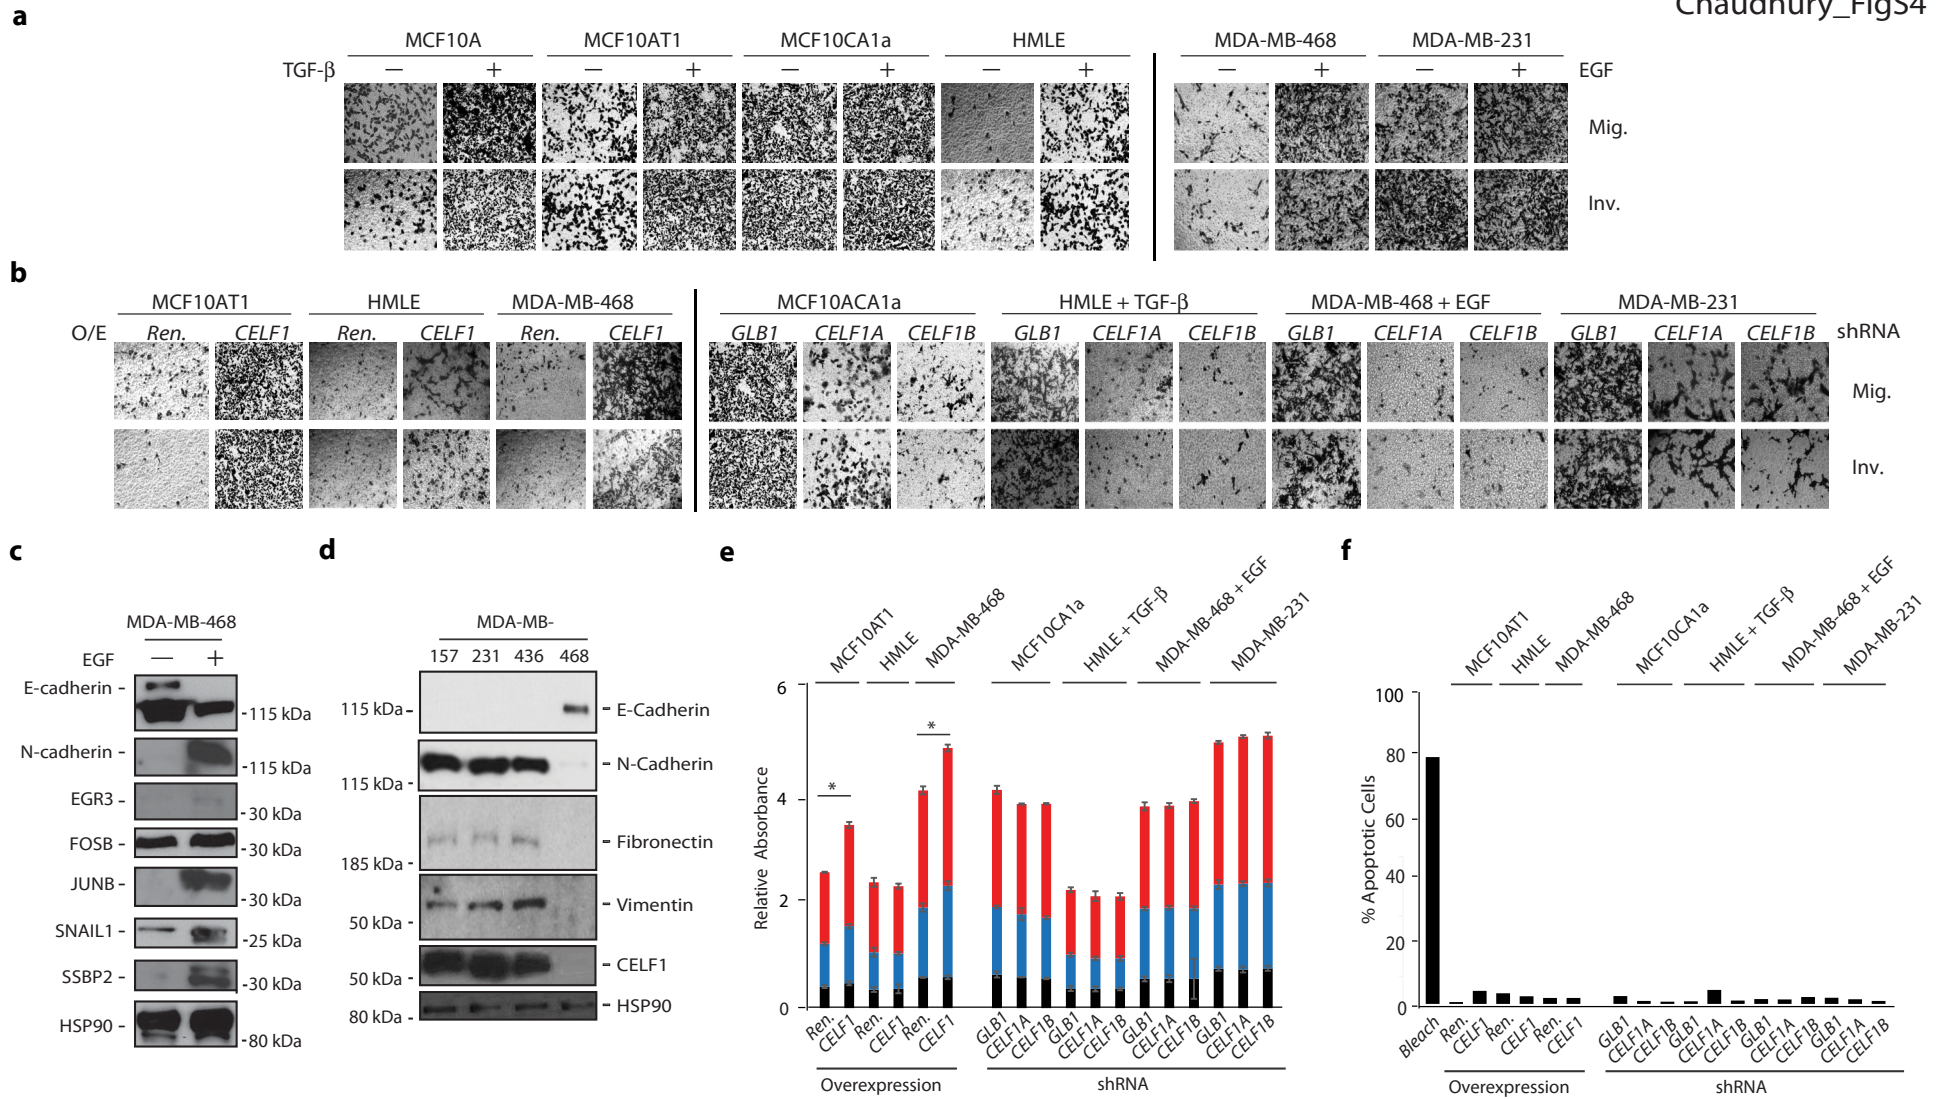

**Supplementary Figure 4. CELF1 Basal Expression and Misexpression in a Panel of Breast Cancer Cell lines.** (a and b) Representative crystal violet-stained images of migratory (*Mig.*) and invasive (*Inv.*) cells treated with the indicated EMT inducers (a) or transfected with the indicated *CELF1* overexpression or shRNA constructs. (c) Immunoblot analysis of proteins encoded by GRE-containing mRNAs in untreated and EGF-treated MDA-MB-468 cells. (d) Immunoblot analysis of epithelial markers, mesenchymal markers, and *CELF1* in indicated cell types. Note that basal *CELF1* protein expression correlates with the *in vivo* metastatic potential of each of the cell lines. For (c) and (d), samples were derived from the same experiment and gels were processed in parallel. Each blot was probed for HSP90 to confirm equal loading - a representative blot is shown. (e) The impact of misexpression of *CELF1* on proliferation of each of the indicated cell lines was assessed via MTT assay. (f) The impact of misexpression of *CELF1* on viability of each of the indicated cell lines was assessed via Annexin V/PI staining. In panels (a), (b), (e) and (f): *Ren.* = *Renilla* luciferase; *GLB1* = shRNA targeting  $\beta$ -galactosidase (*GLB1*). All panels are representative of a minimum of three individual experimental replicates. For immunoblots depicted, samples were derived from the same experiment and gels were processed in parallel. Error bars depict standard error (SEM) of the mean. \* =  $p$ val  $\leq$  0.05 (Student's t-test). Full scans of blots are shown in Supplementary Figure 11.

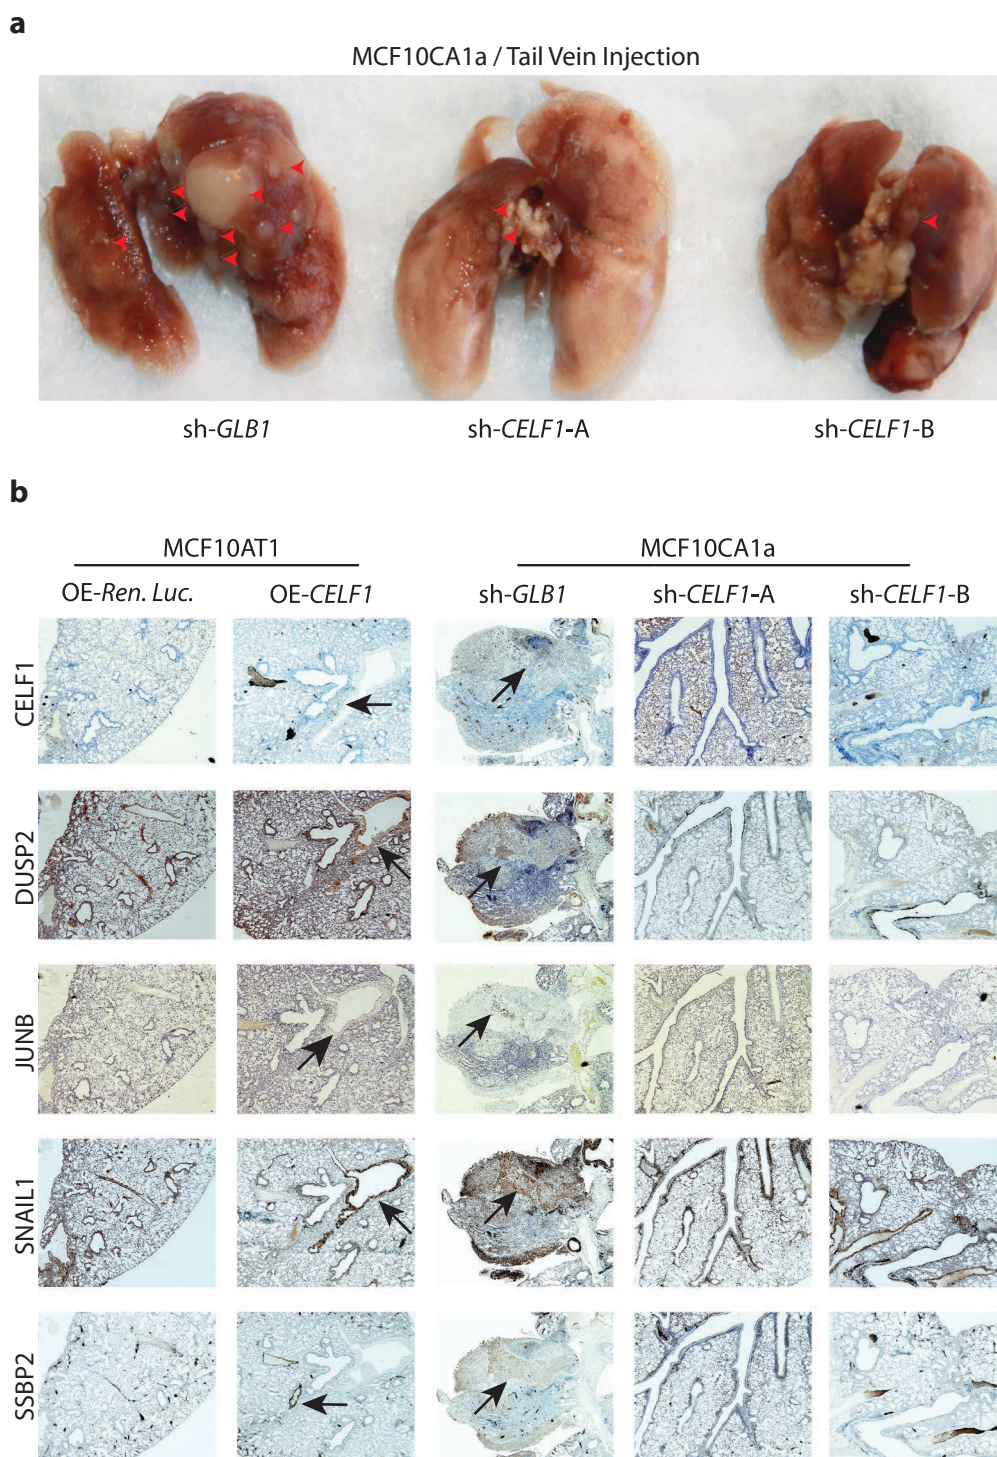

**Supplementary Figure 5. Manipulation of *CELF1* Expression Impacts *In Vivo* Metastatic Colonization and Protein Expression of the GRE-containing mRNAs.** (a) Representative images of gross anatomy of surgically excised and 10% neutral-buffered formalin fixed lungs used to count metastatic nodules (red arrow-heads). Images are representative of at least three individual experimental replicates. (b) Representative images of expression of *CELF1* and indicated GRE-containing gene products in lungs from mice in Figure 6a and 6c. Black arrows represent micrometastasis. All images were obtained with 40x objective.

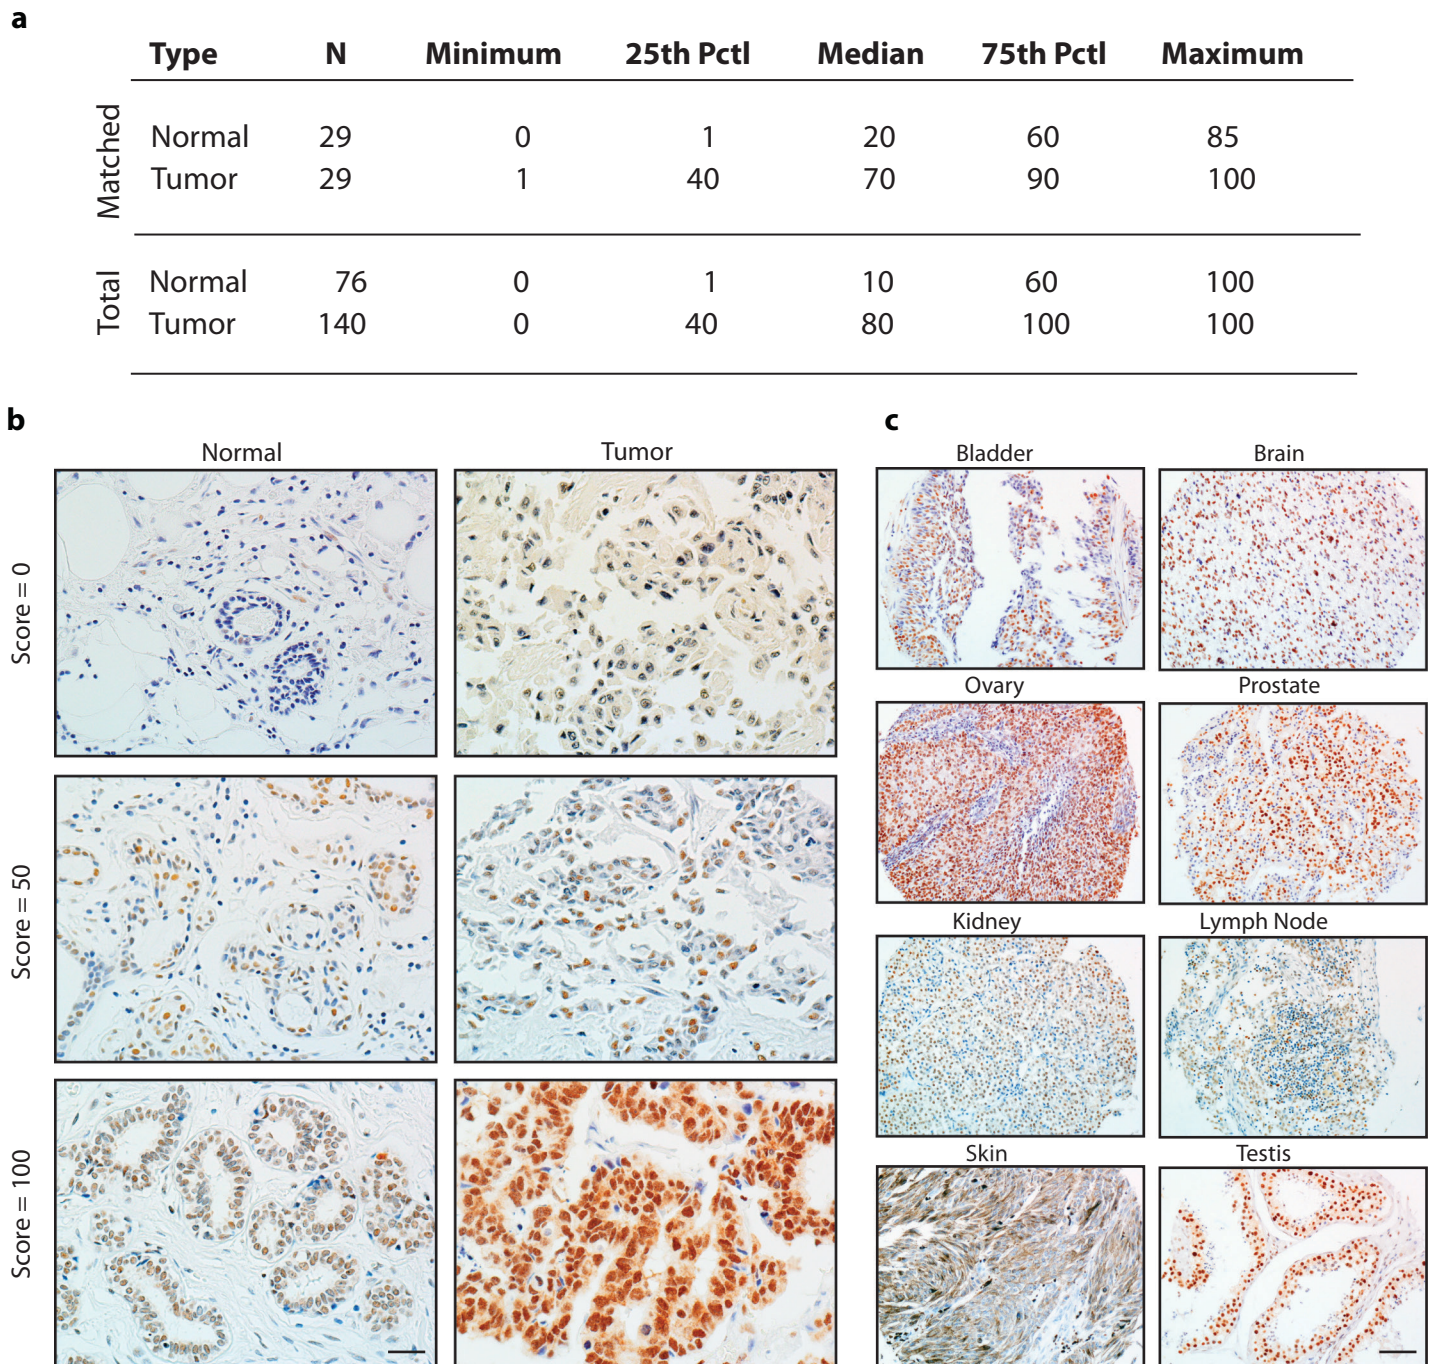

**Supplementary Figure 6. Increased CELF1 Protein Expression in Human Cancers.** (a) Comparison of CELF1 protein expression as assessed by IHC in human breast tumor and adjacent normal tissue specimens, both matched and non-matched. Shown are CELF1 histio scores that were calculated as percent staining (0-100). Pctl, percentile. (b) Representative images of human normal and breast cancer tumor tissues with CELF1 histio scores of 0, 50, and 100. (c) Representative images of positive CELF1 expression in indicated tumor tissues (bladder - 20%; brain - 20%; ovary - 10%; prostate - 5%; kidney - 10%; lymph nodes - 10%; skin - 13.3%; testis - 5% cases were positive). All images were obtained with 20X objective.

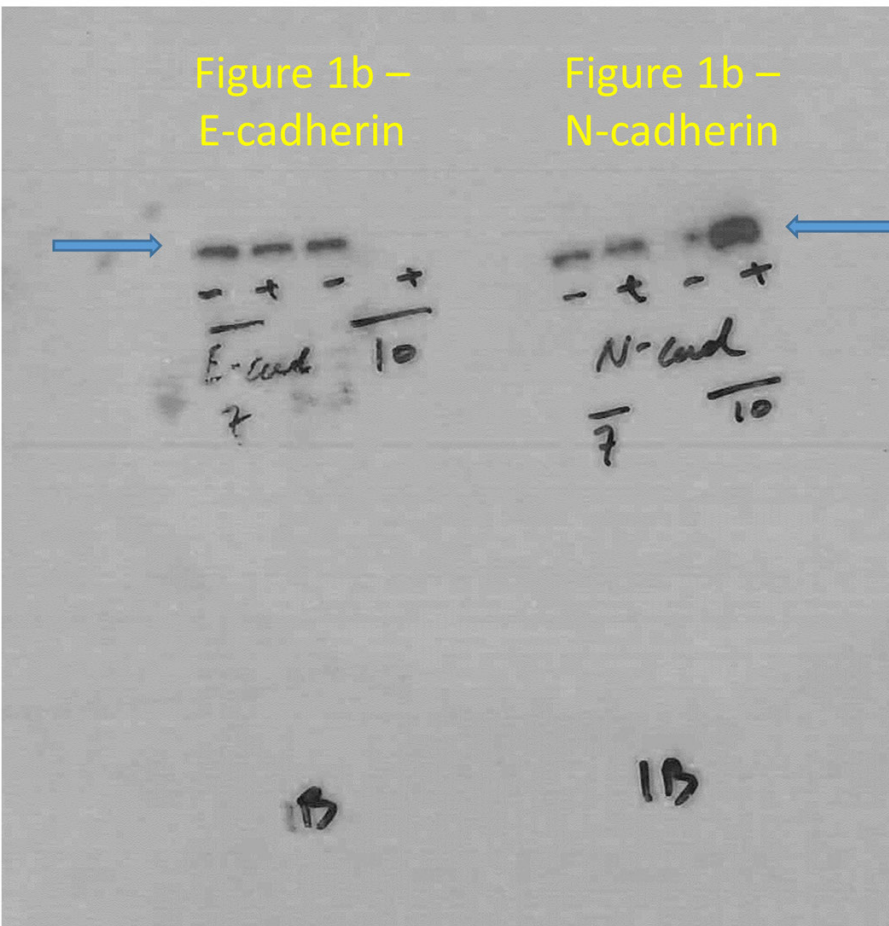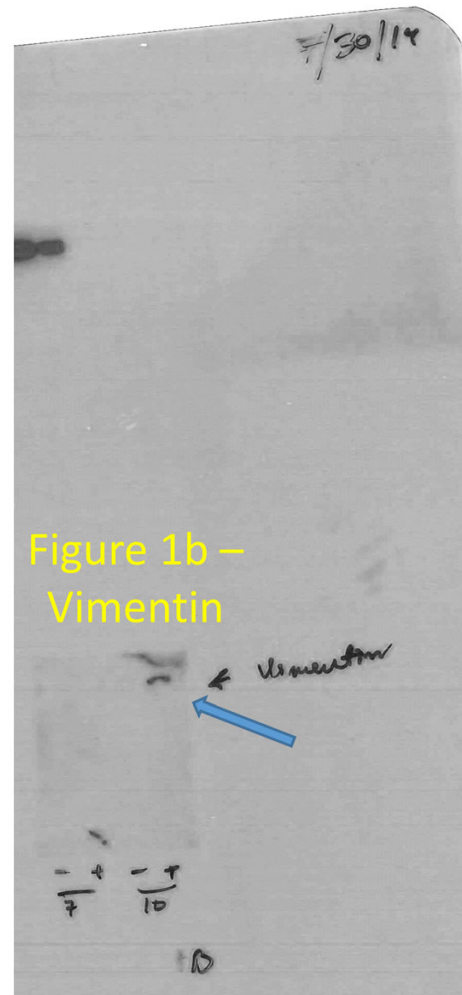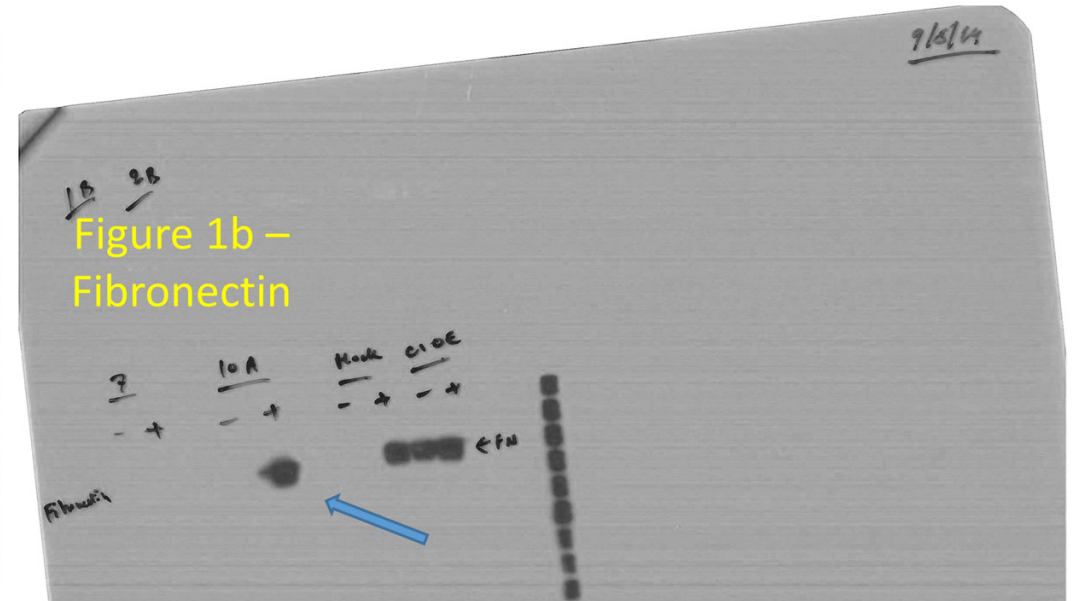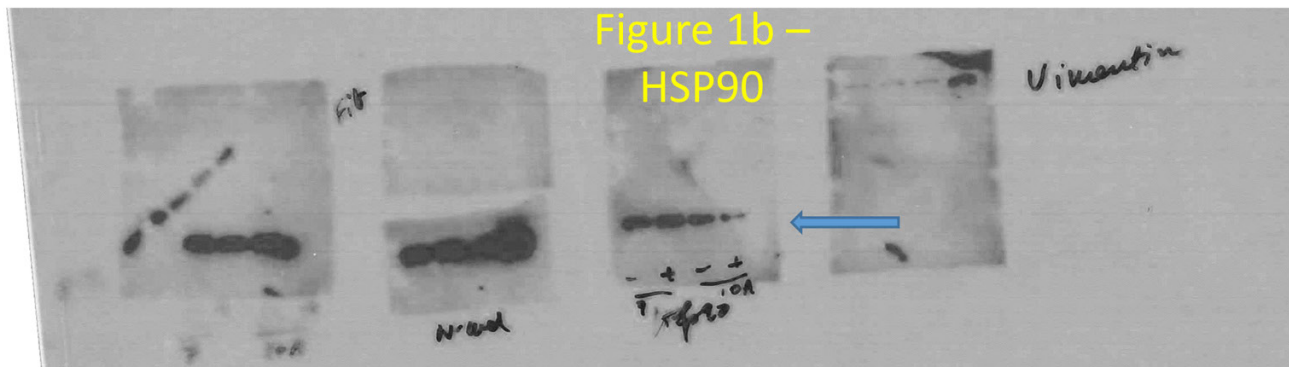

Figure 1d –  
eIF3C

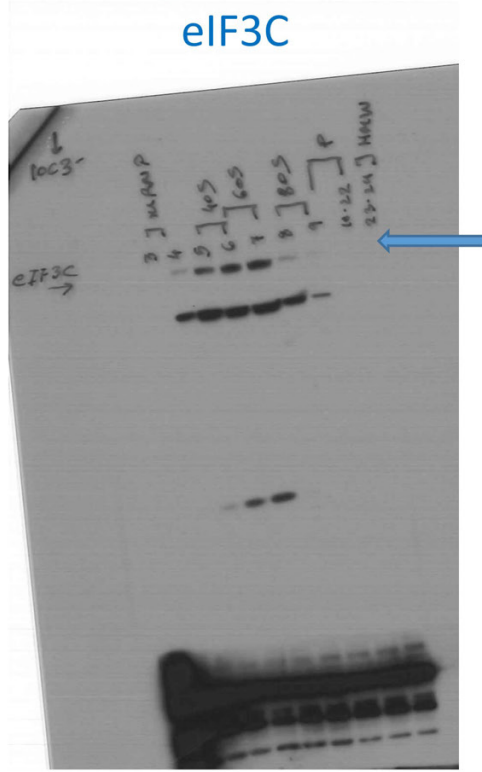

Figure 1d –  
rPS6

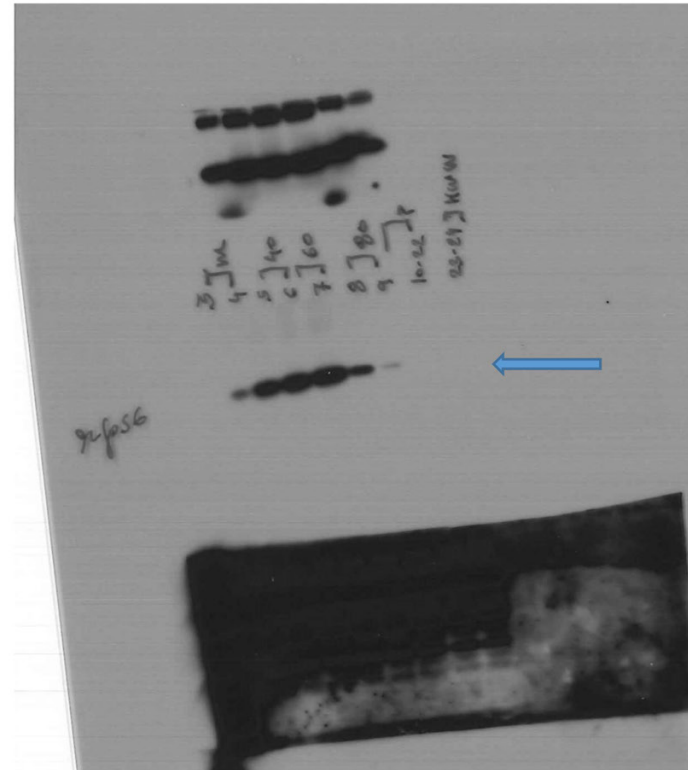

Figure 1d –  
PABP

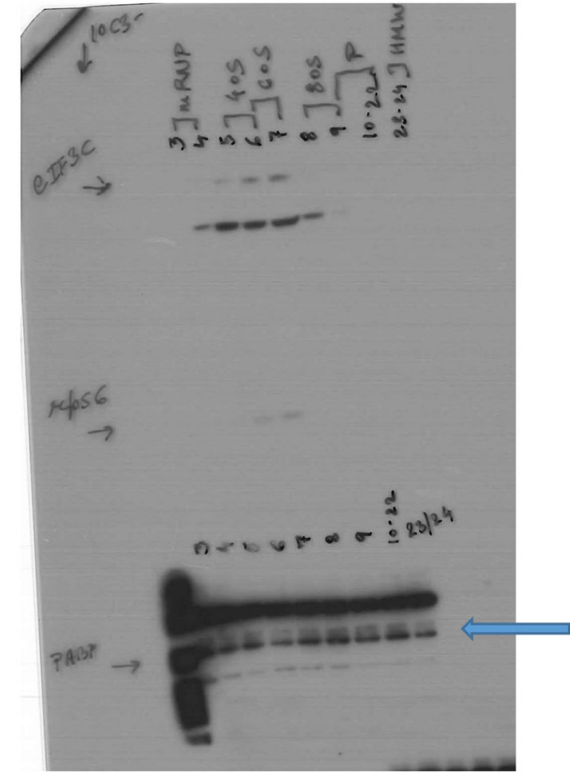



Figure S1\_b

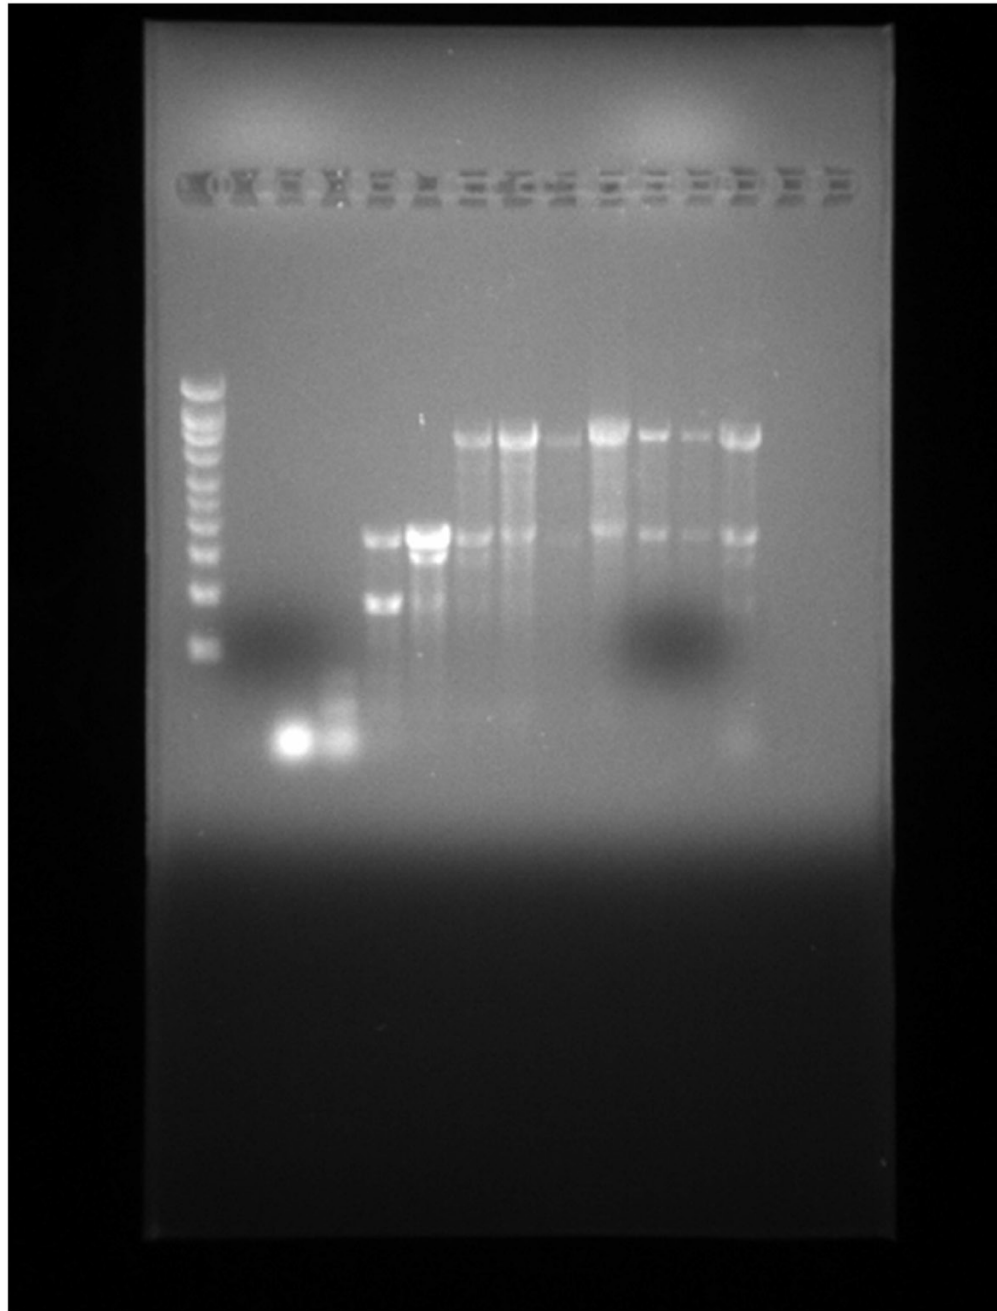

Supplementary Figure 7c

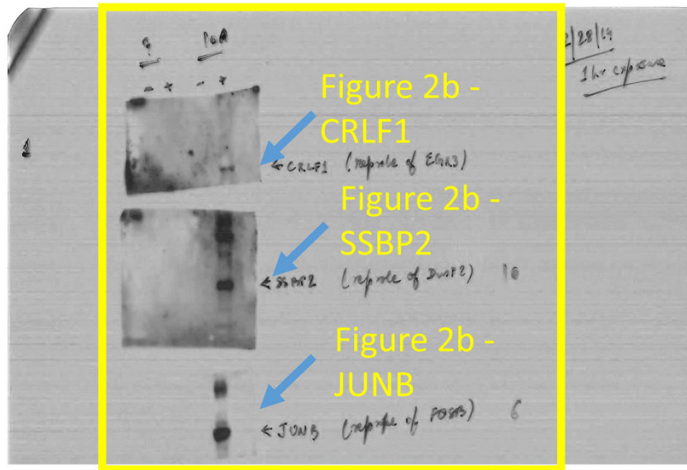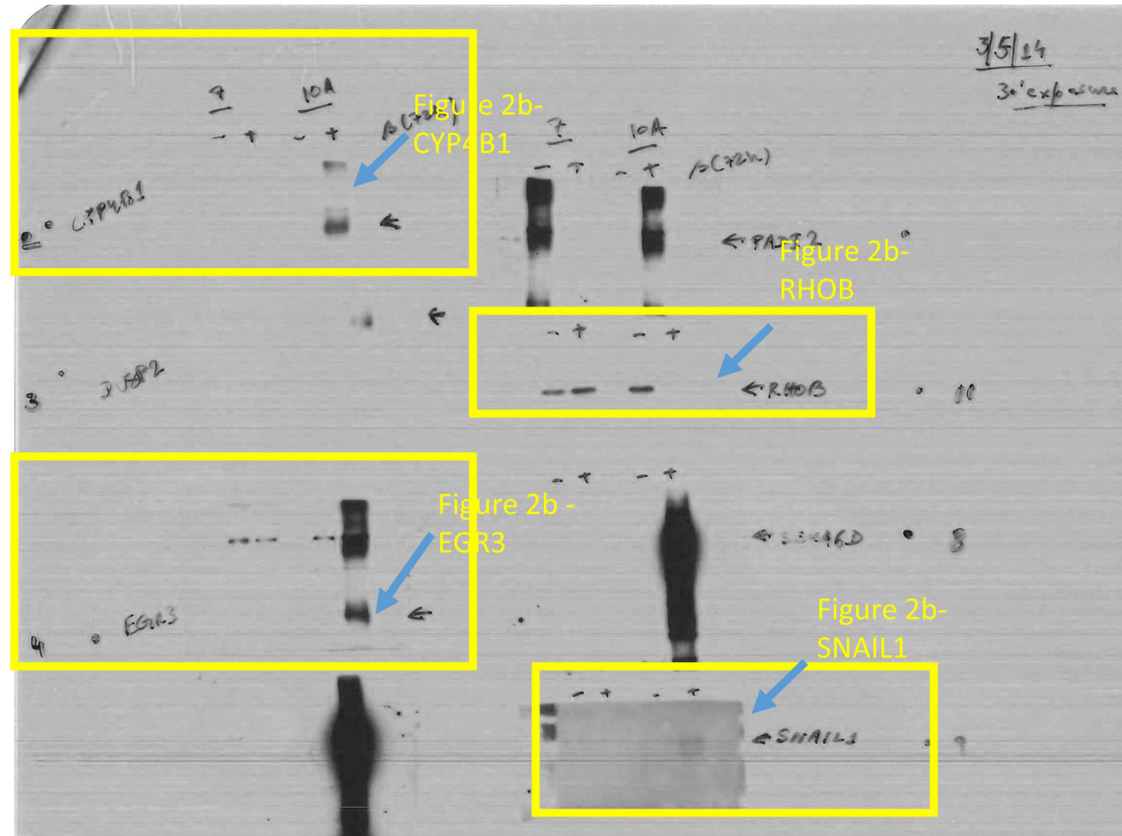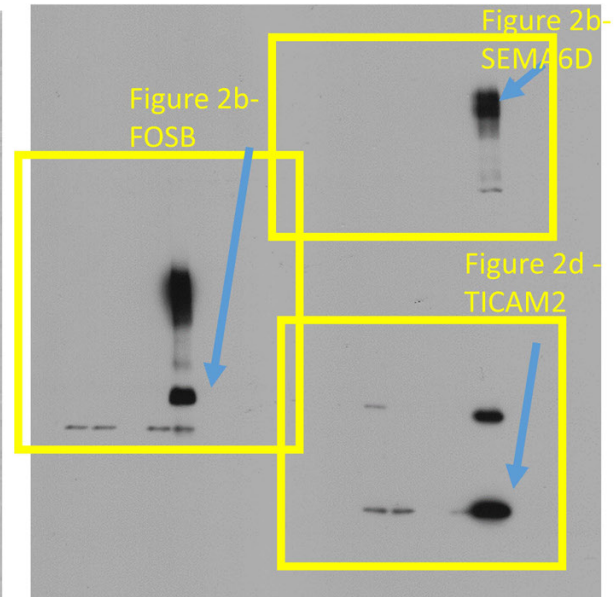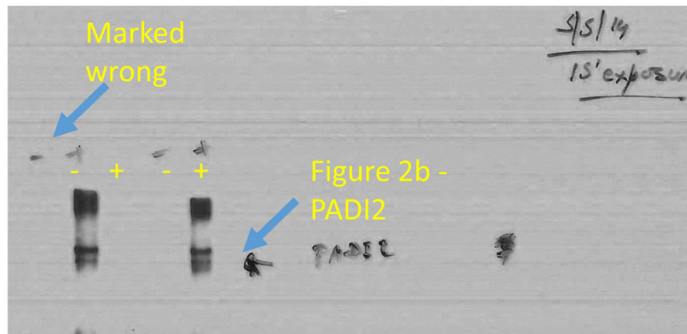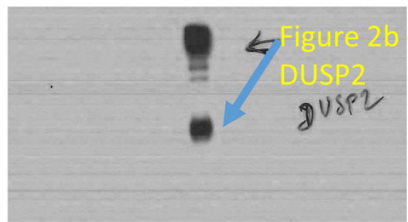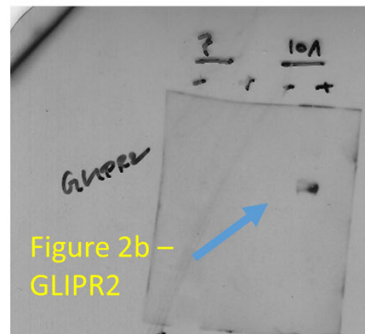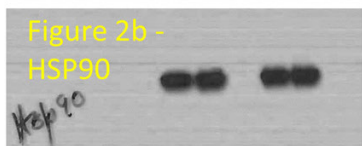

Figure 2b - PPARGC1A missing

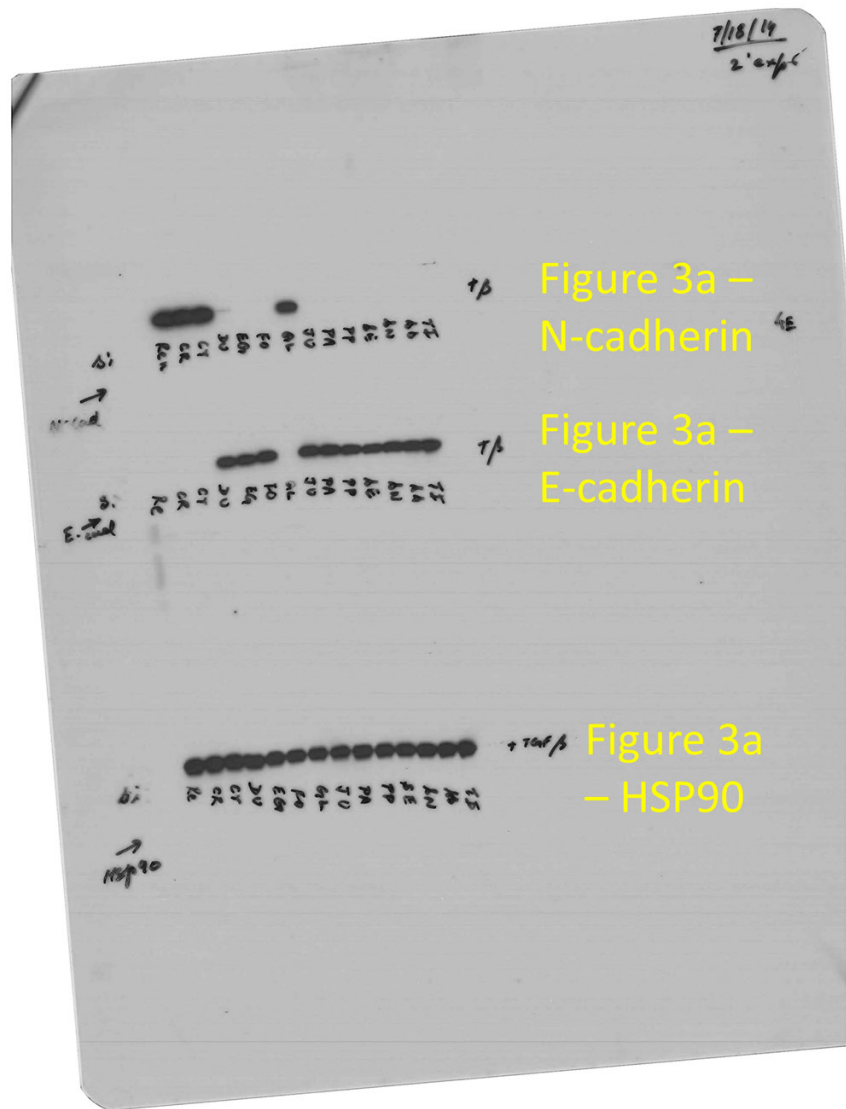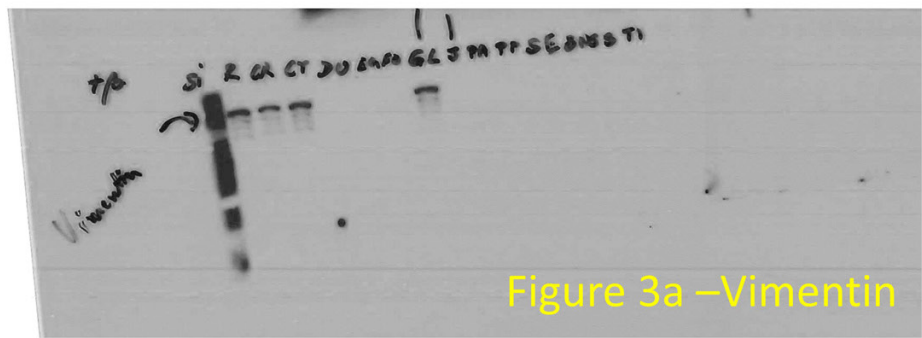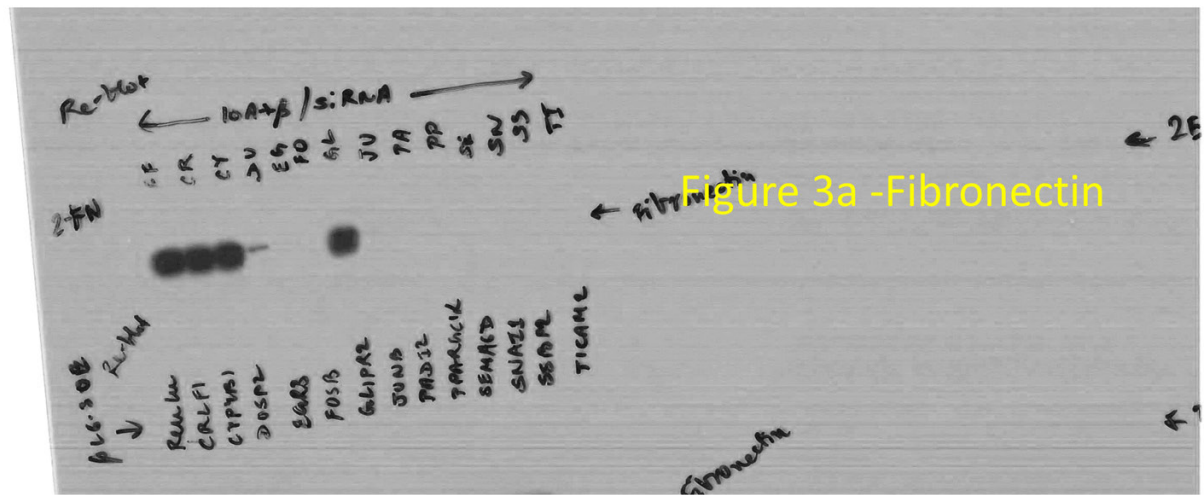

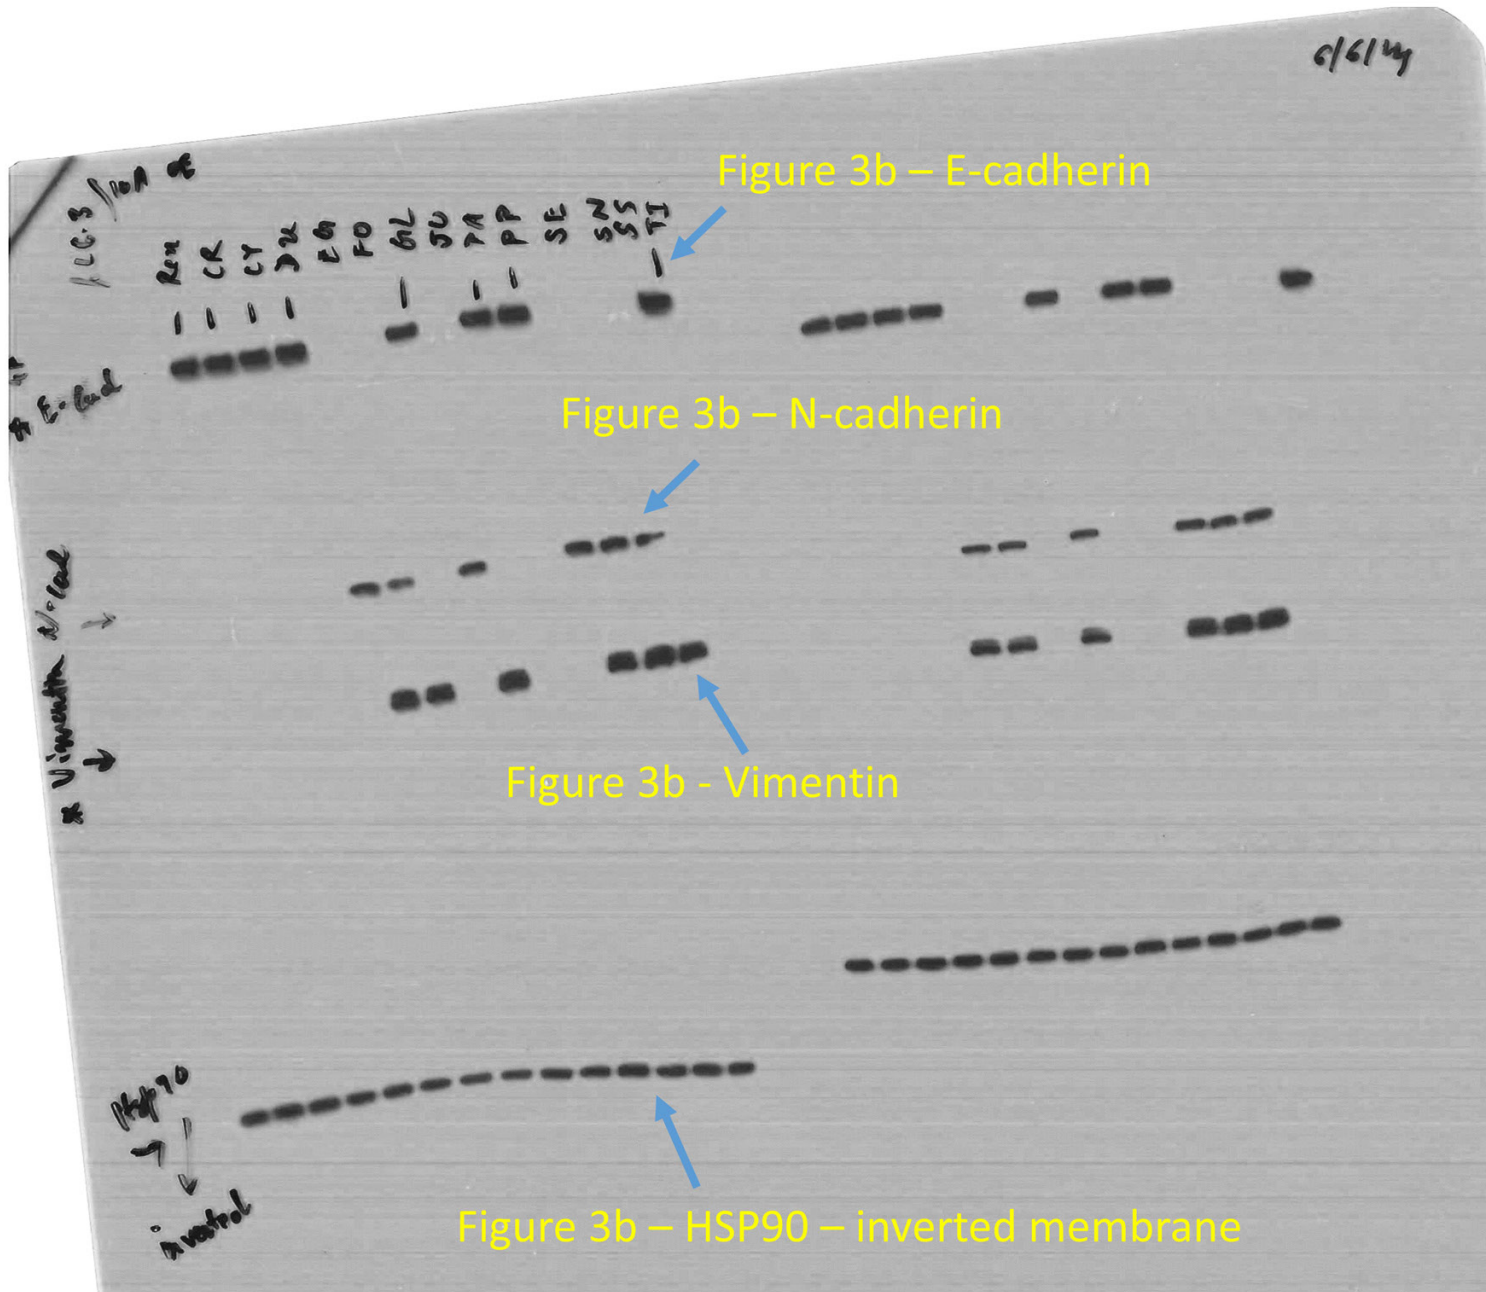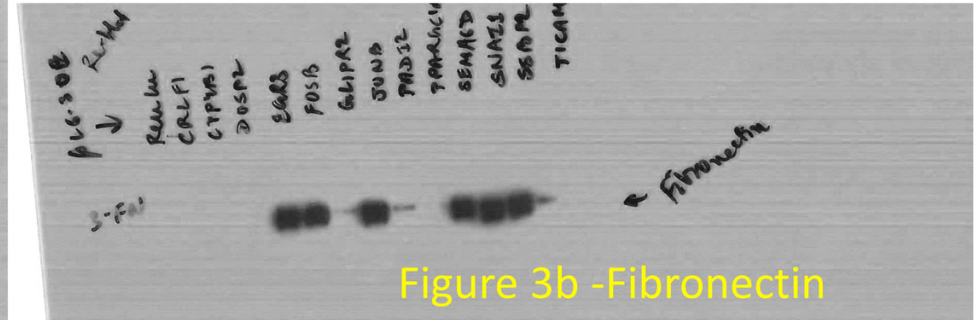

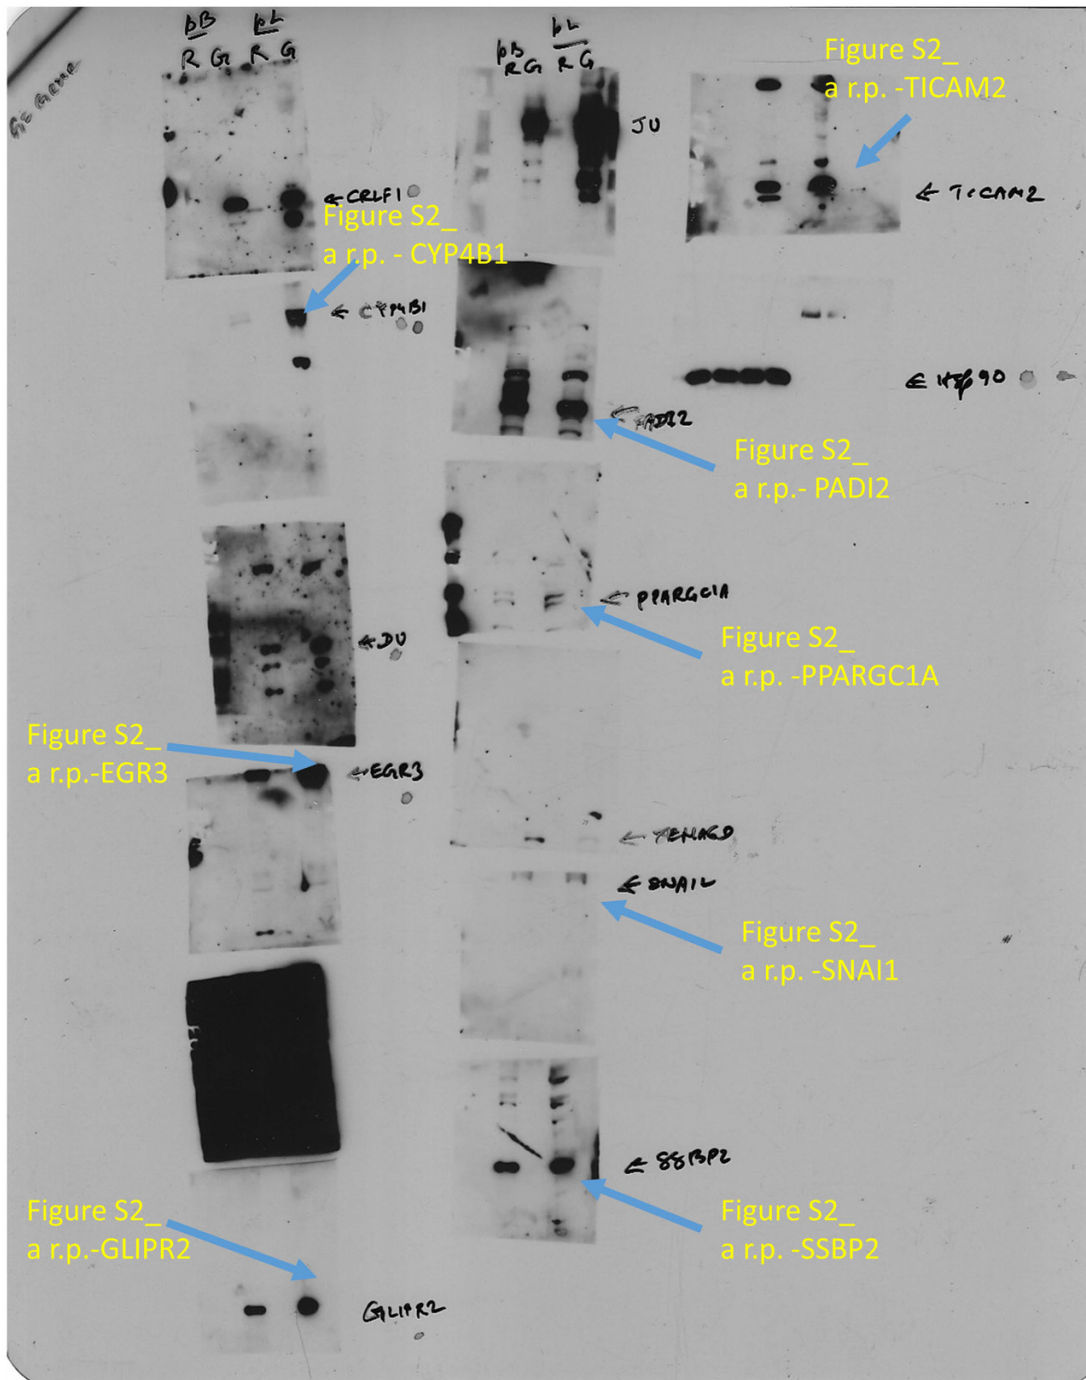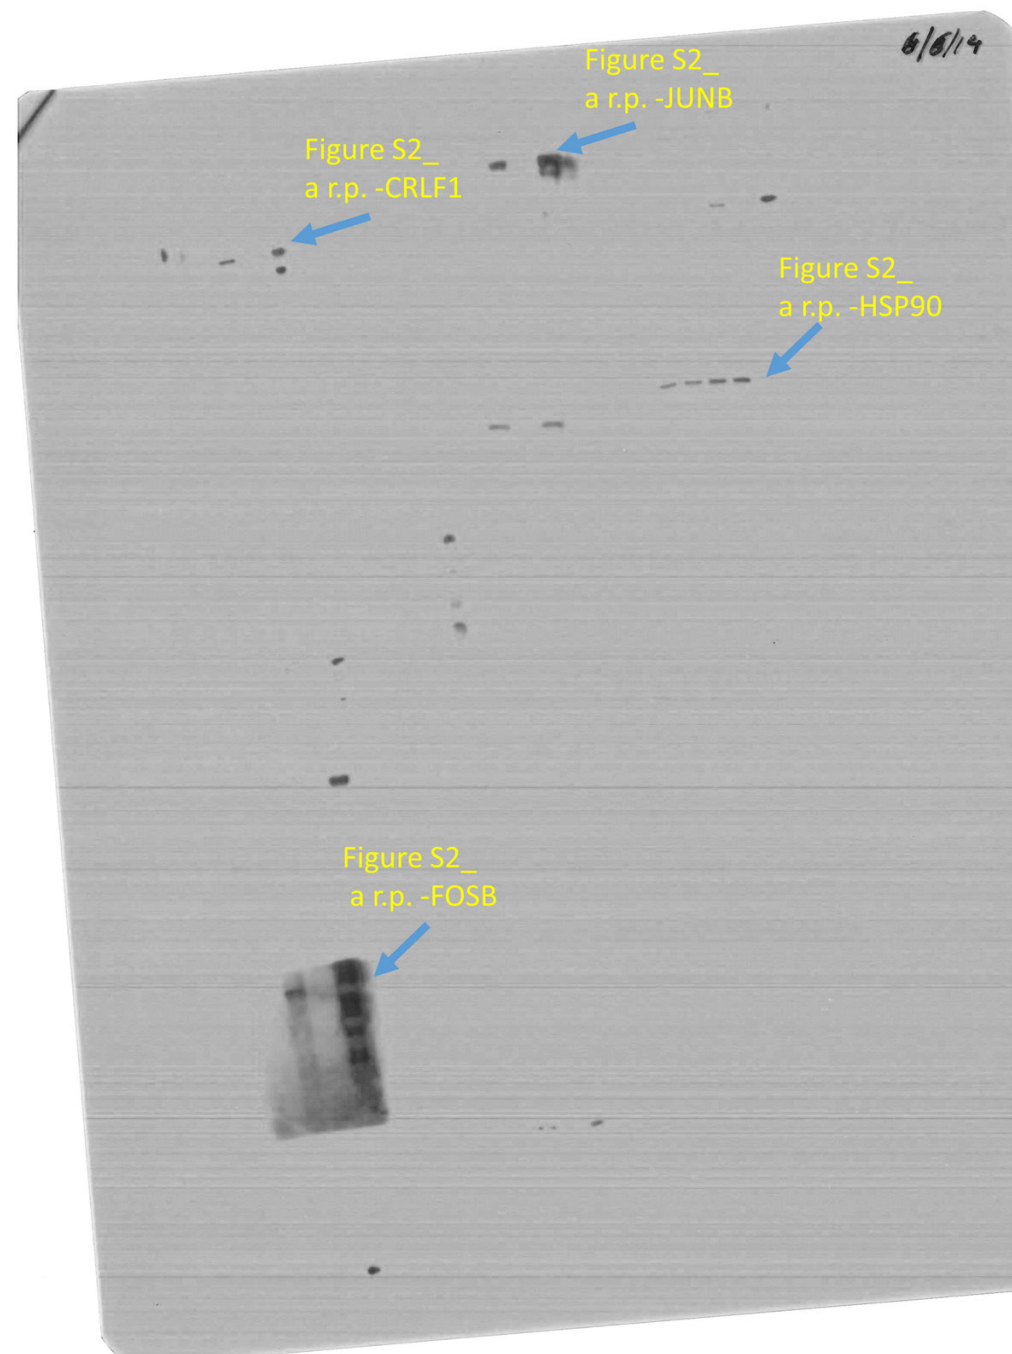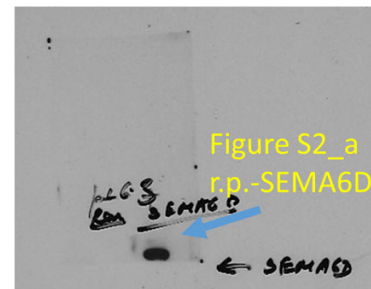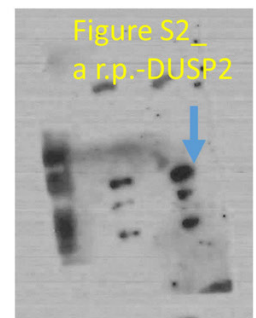

r.p. - Right Panel

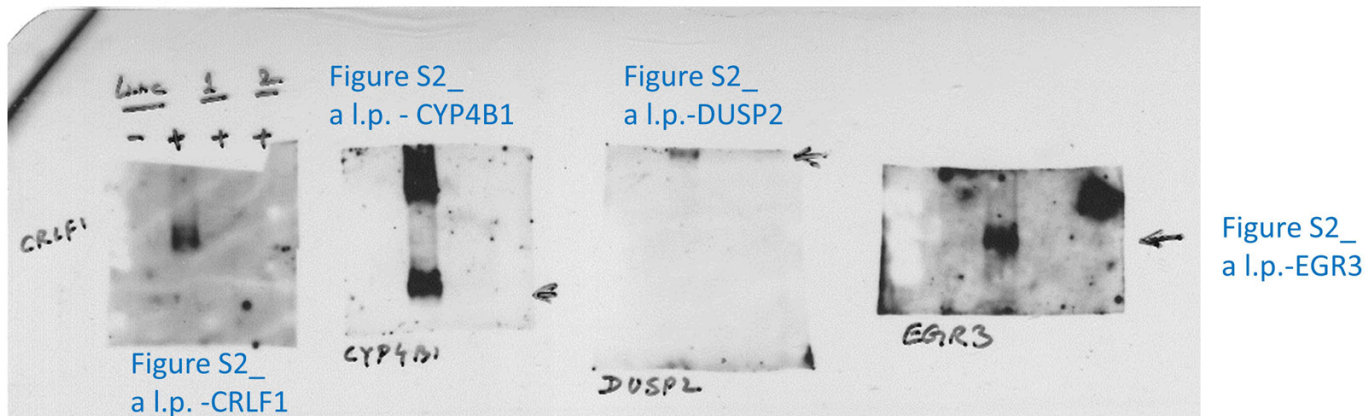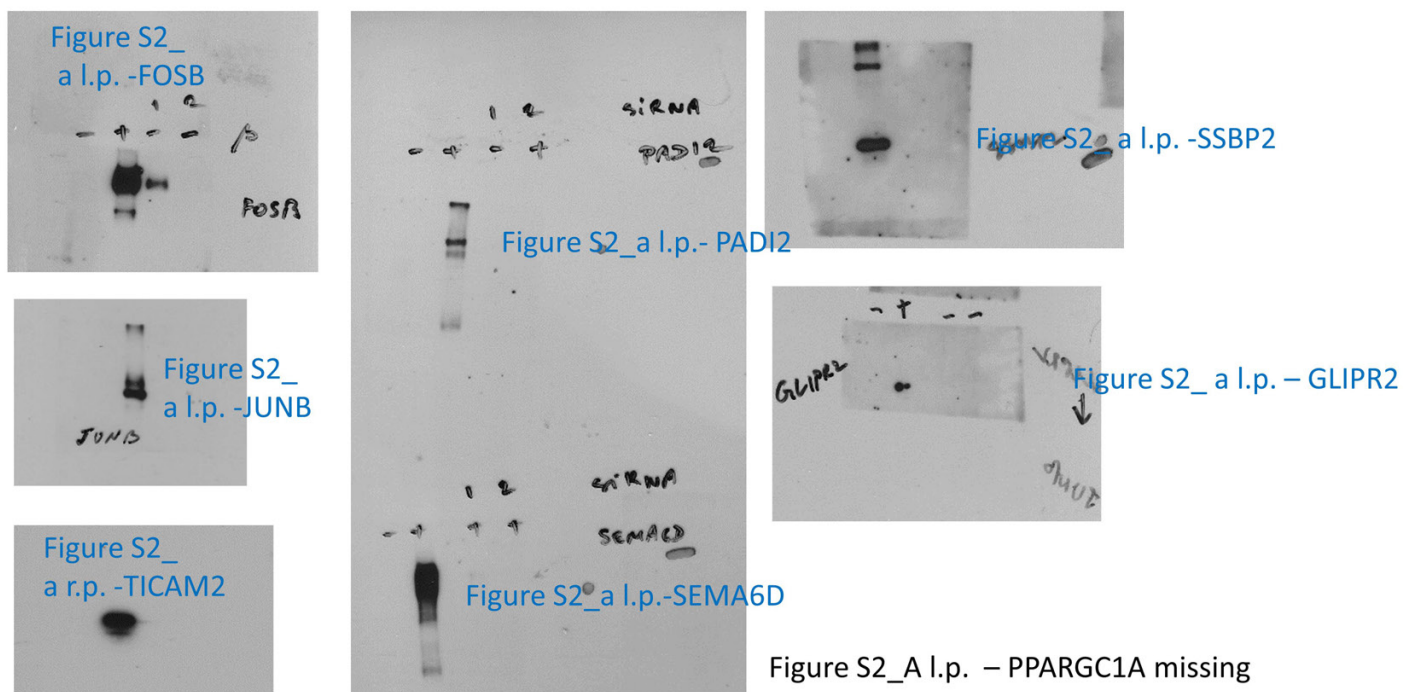

Figure S2\_A l.p. - PPARGC1A missing

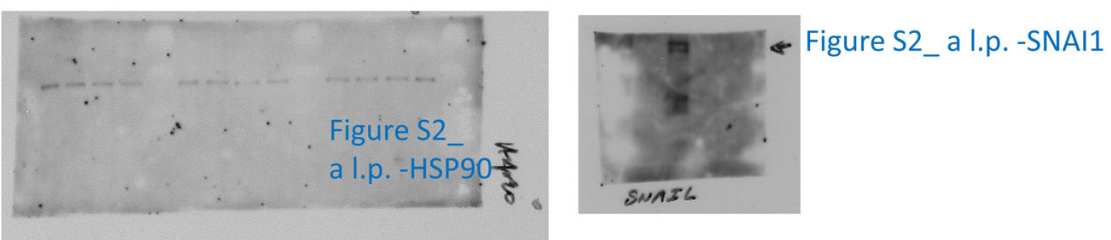

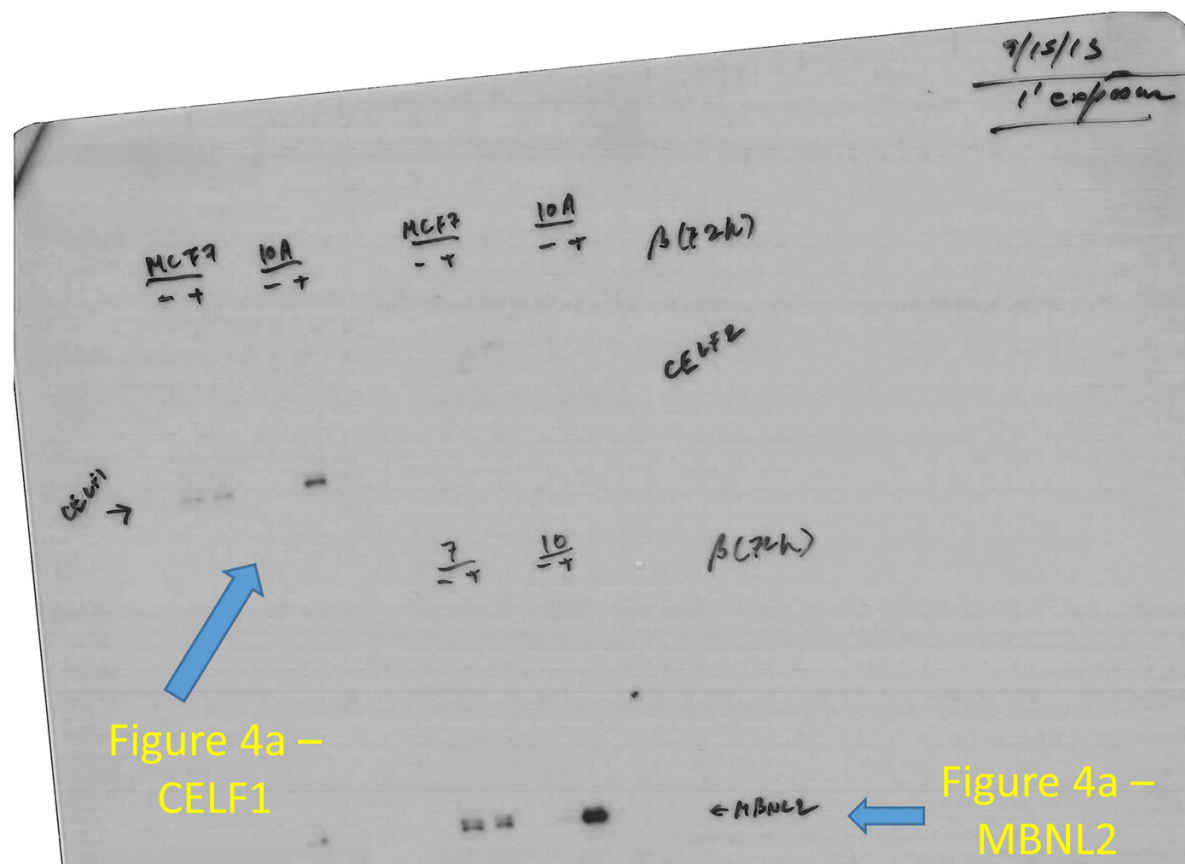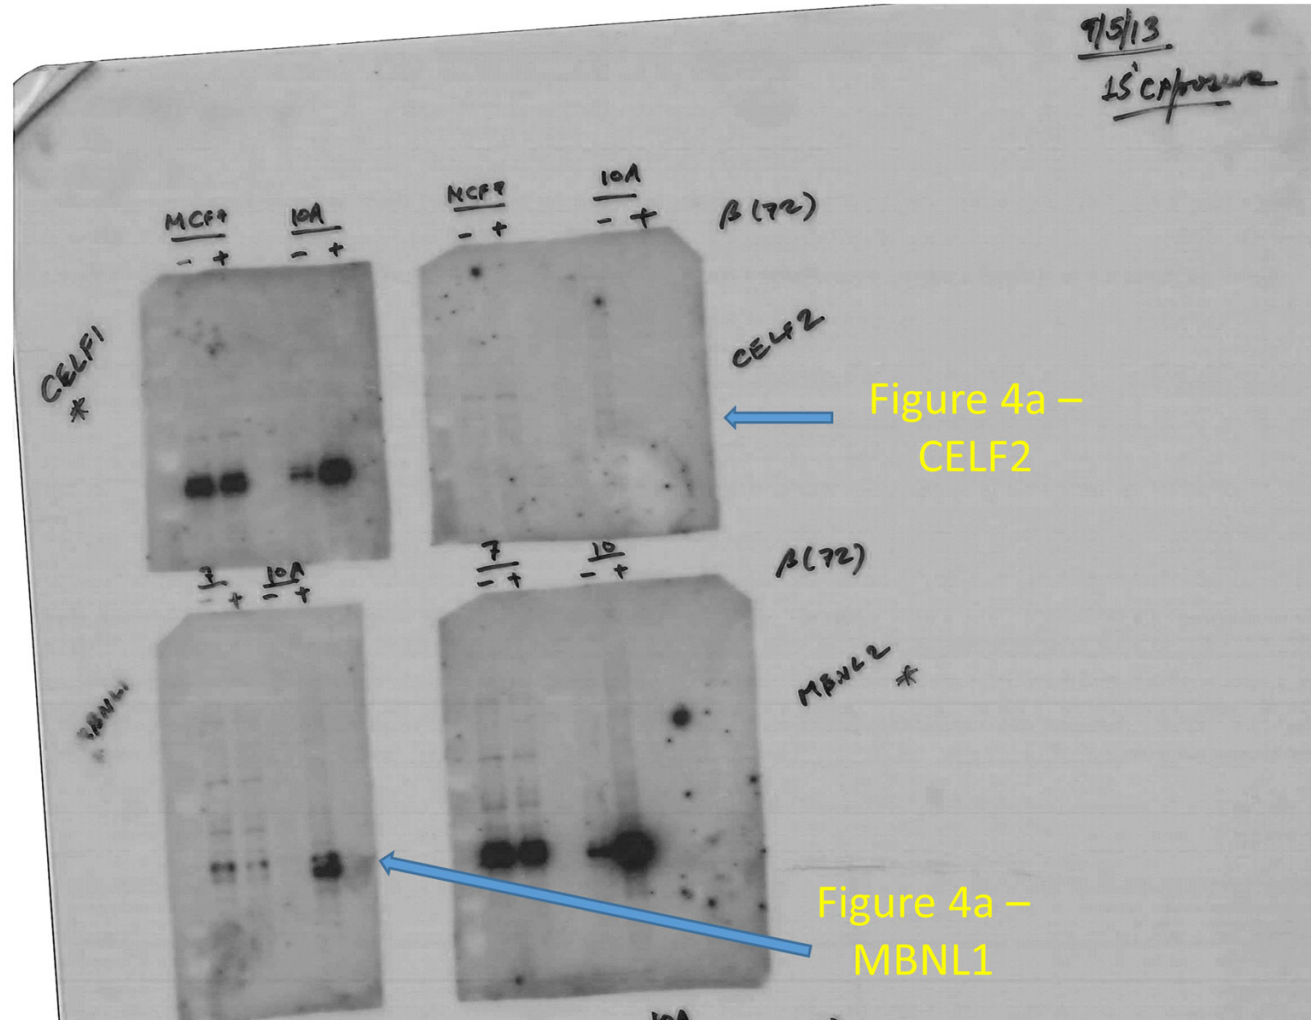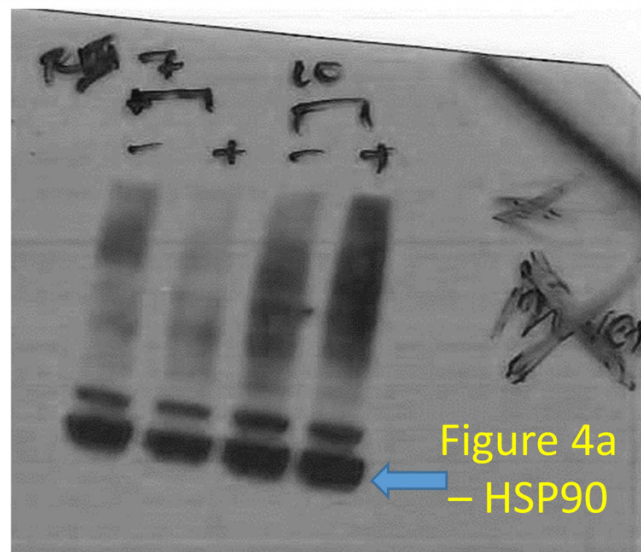

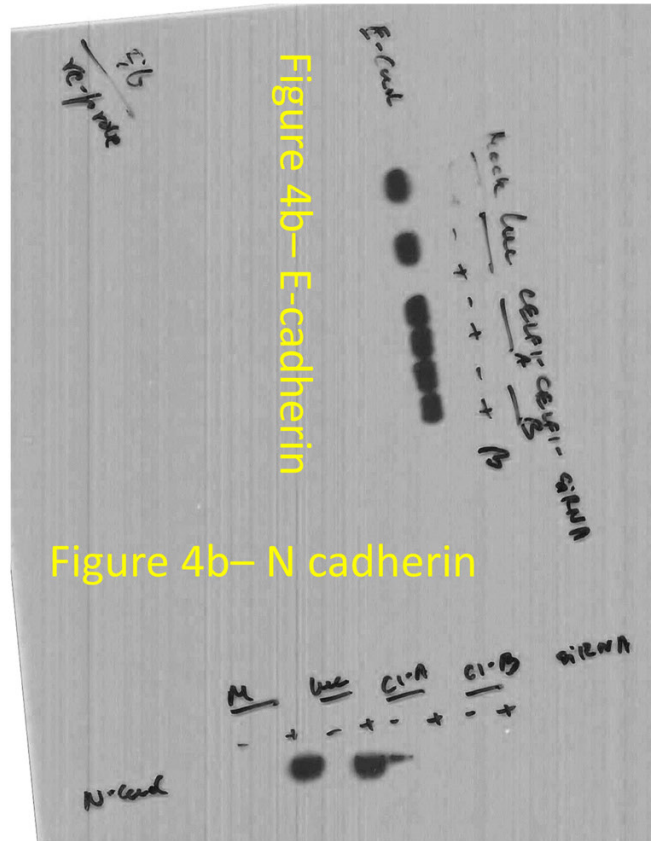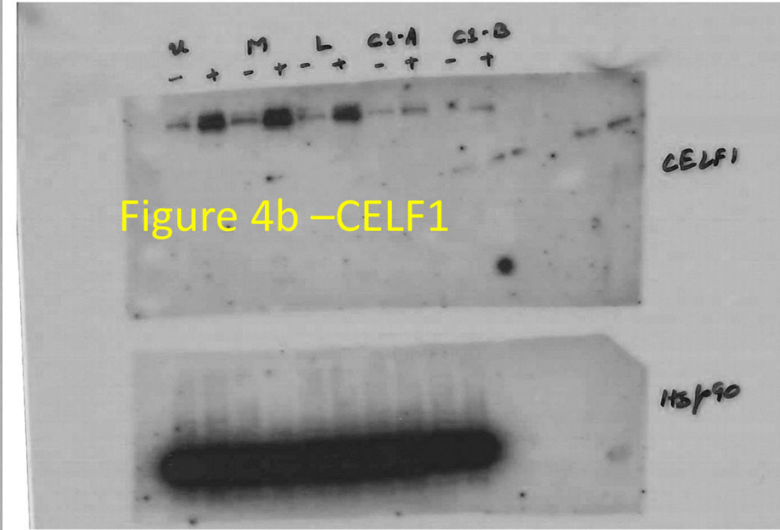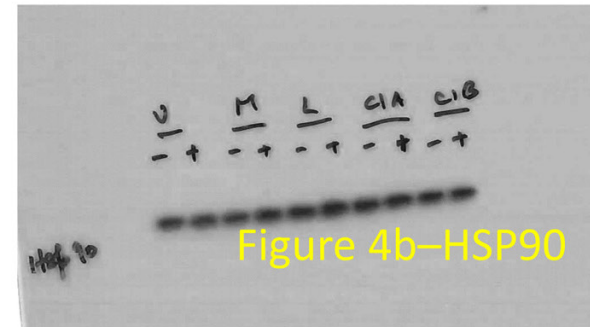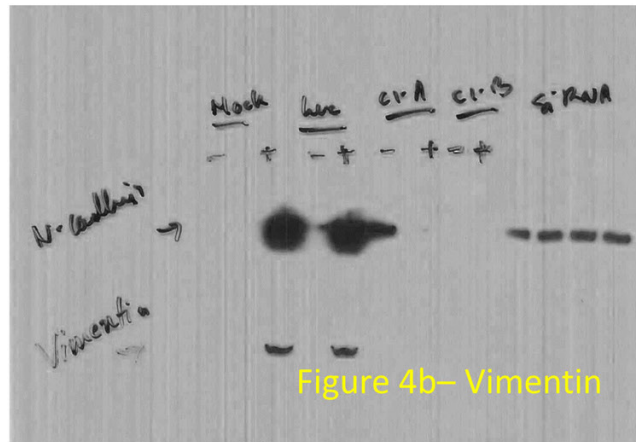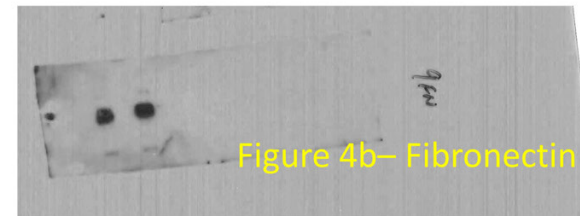



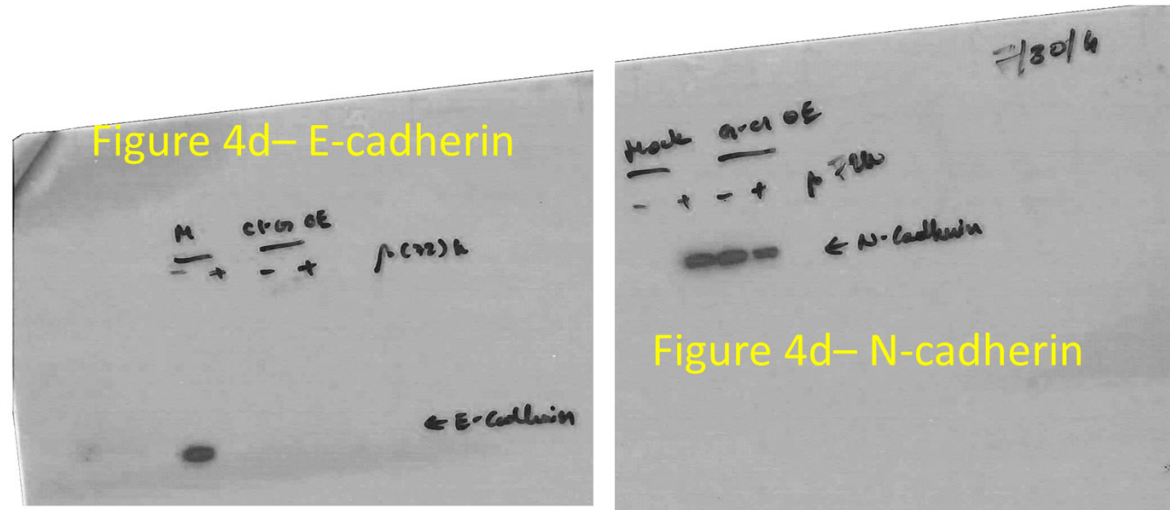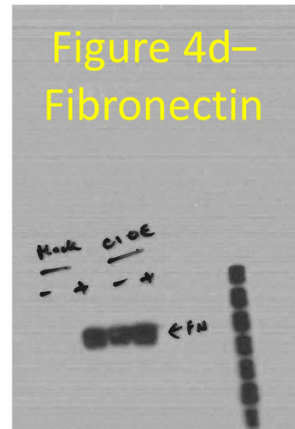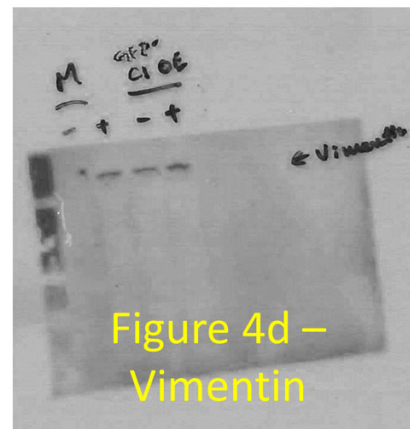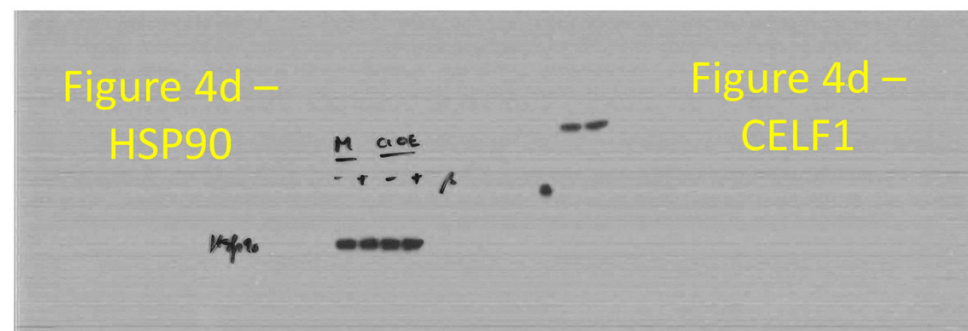

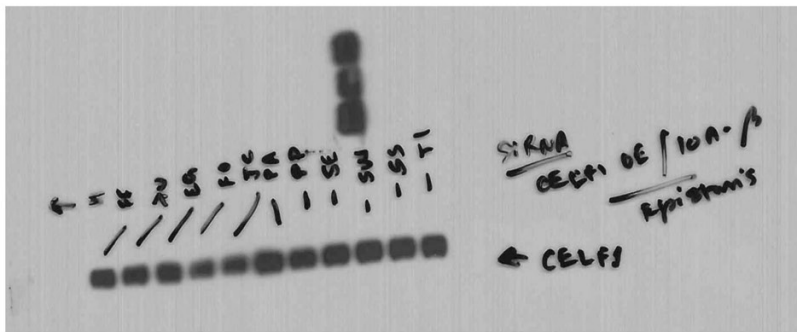

Figure 4h – CELF1

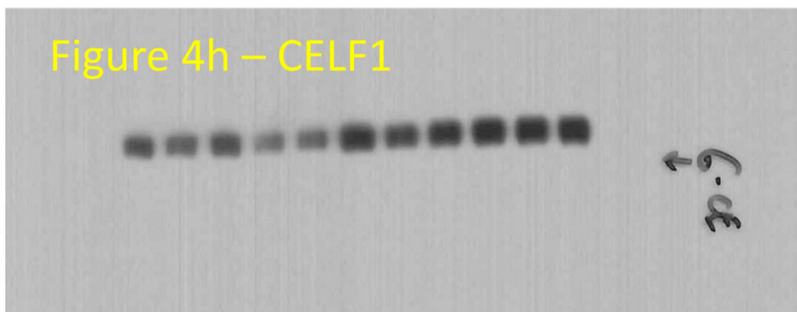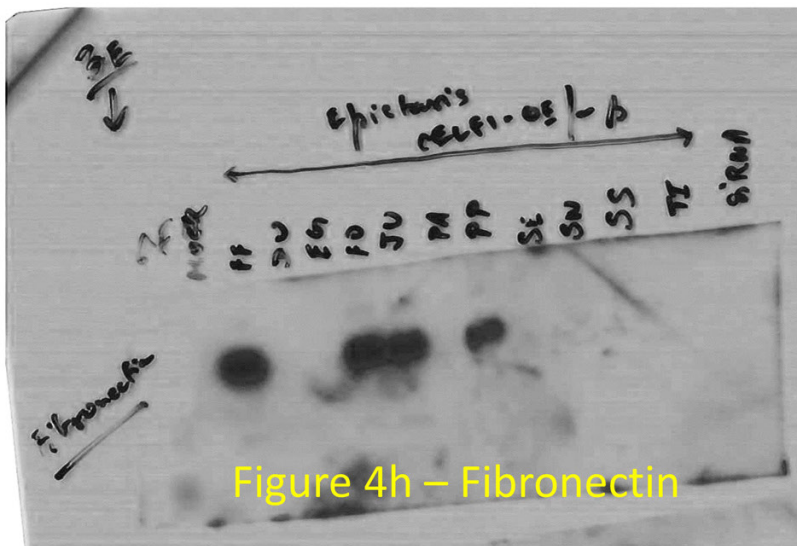

Figure 4h – Fibronectin

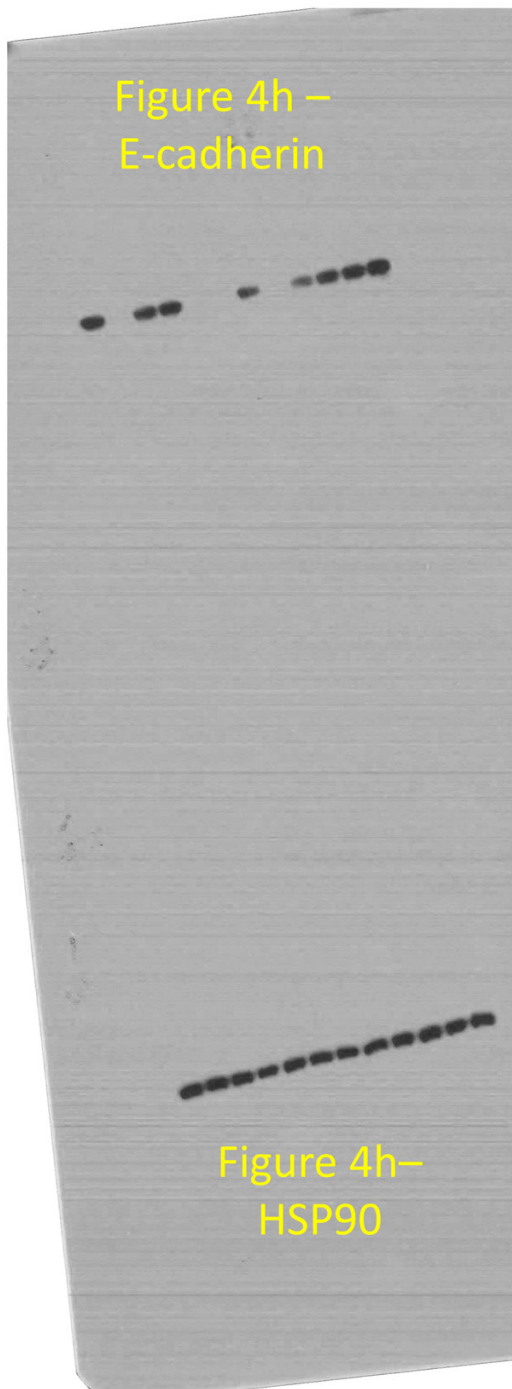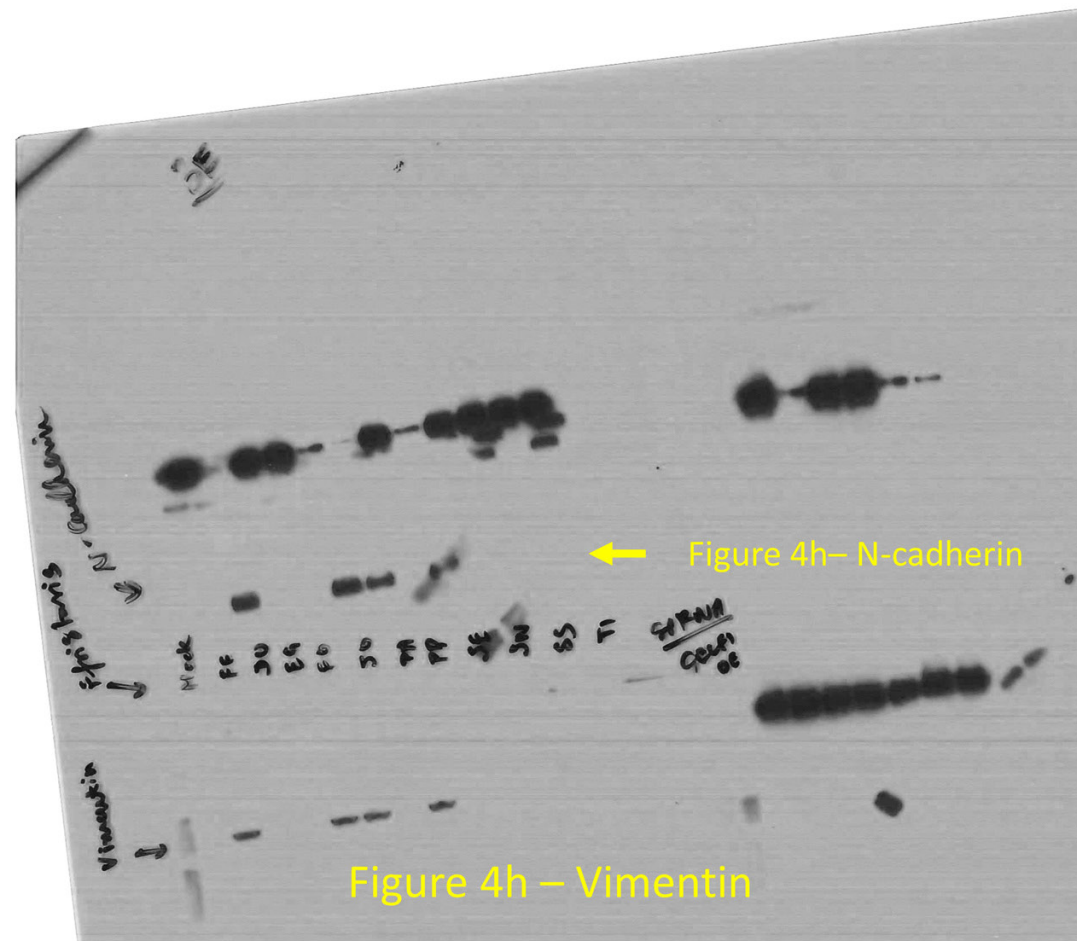

Figure 4h – N-cadherin

Figure 4h – Vimentin

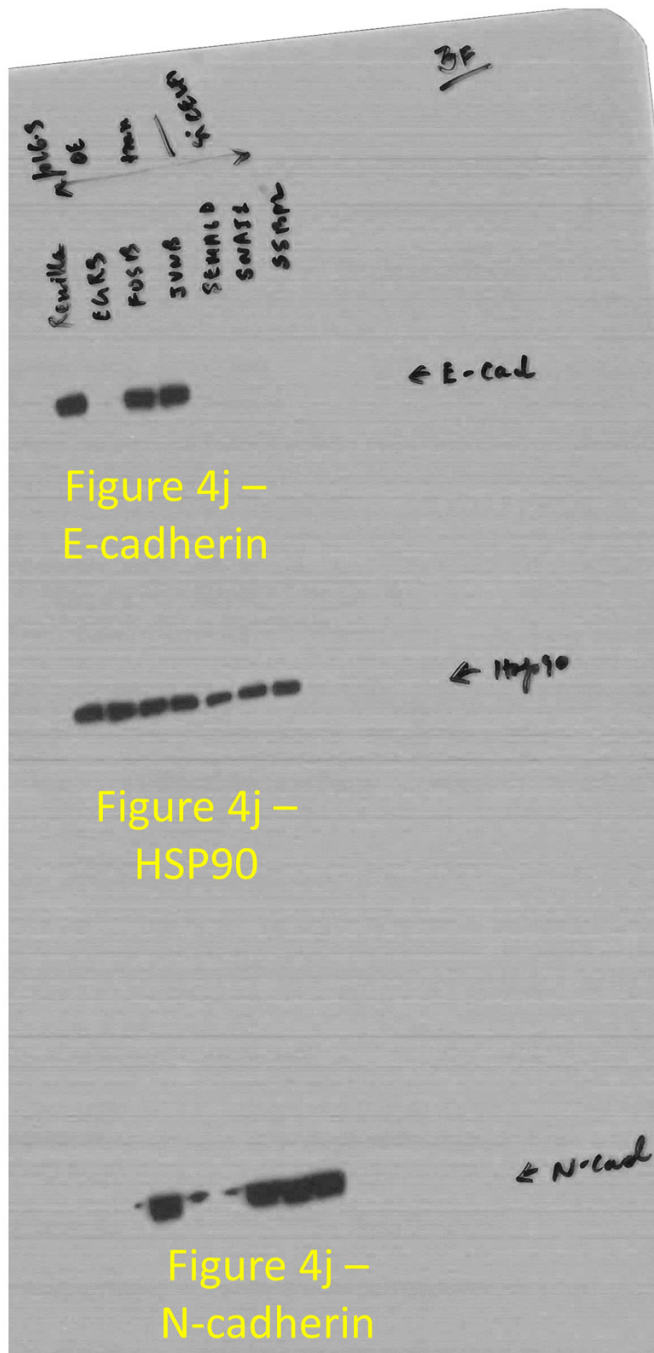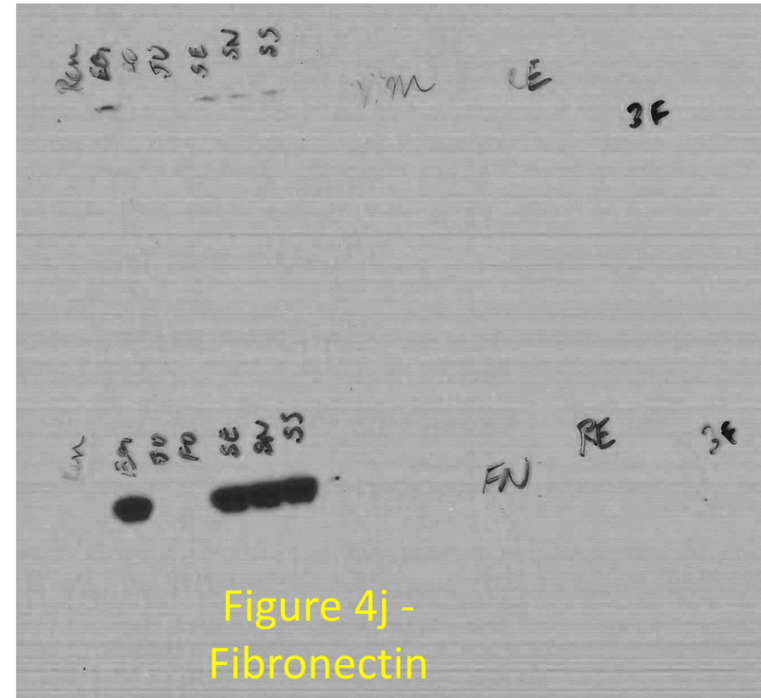

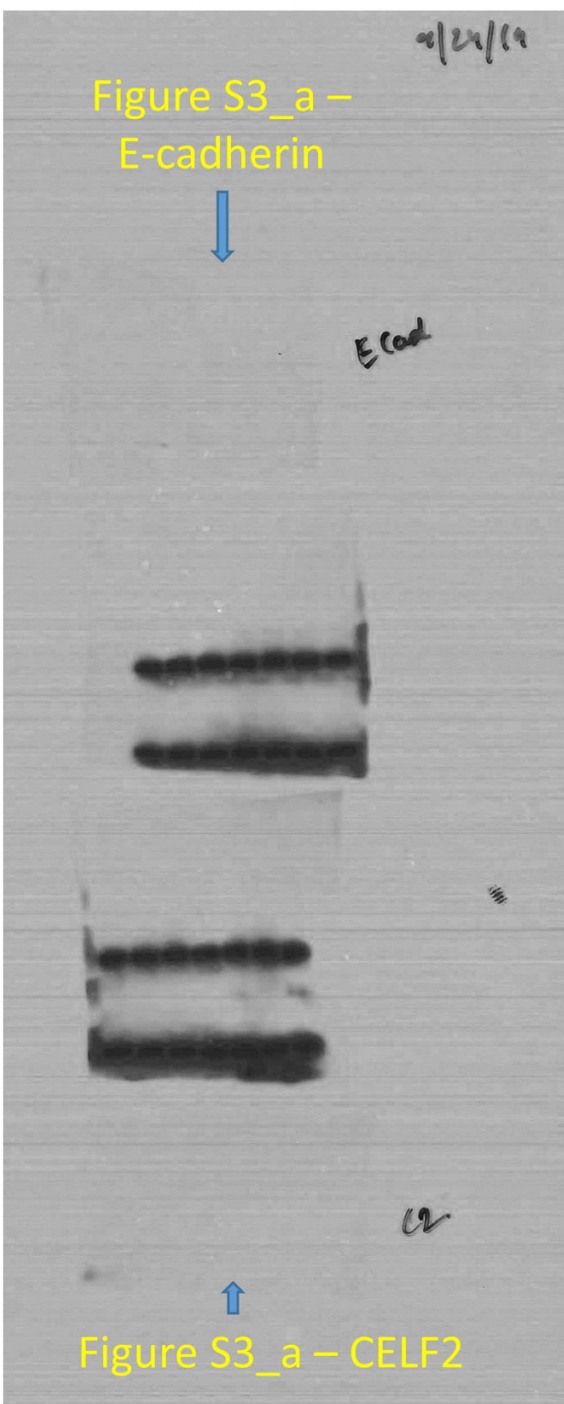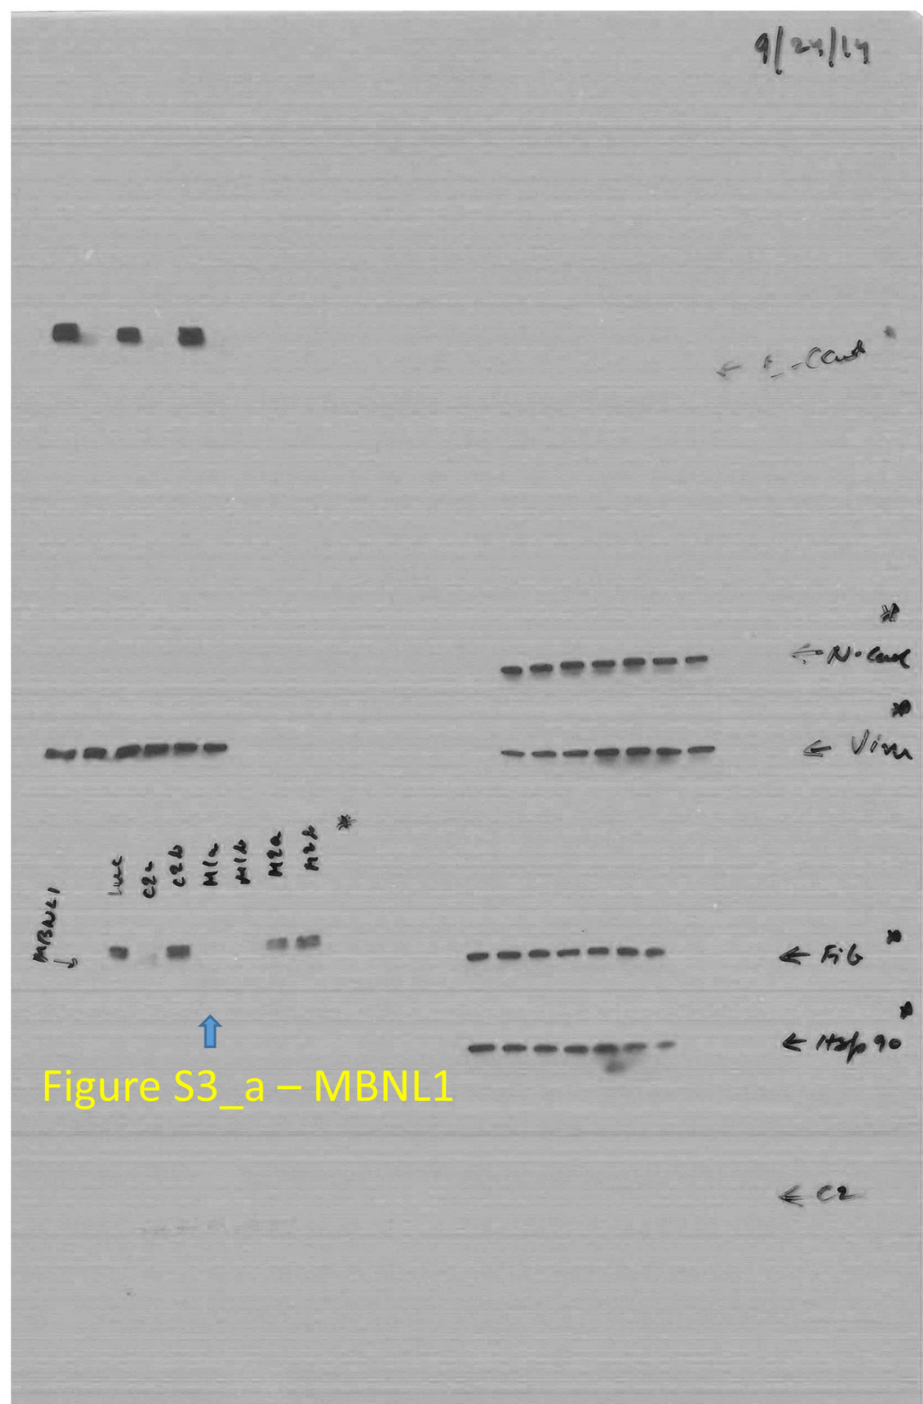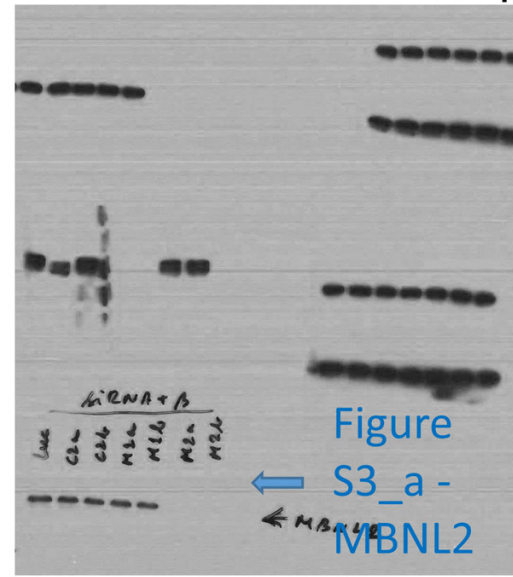

- Figure S3\_a – N-cadherin
- Figure S3\_a – Vimentin
- Figure S3\_a – Fibronectin
- Figure S3\_a – HSP90

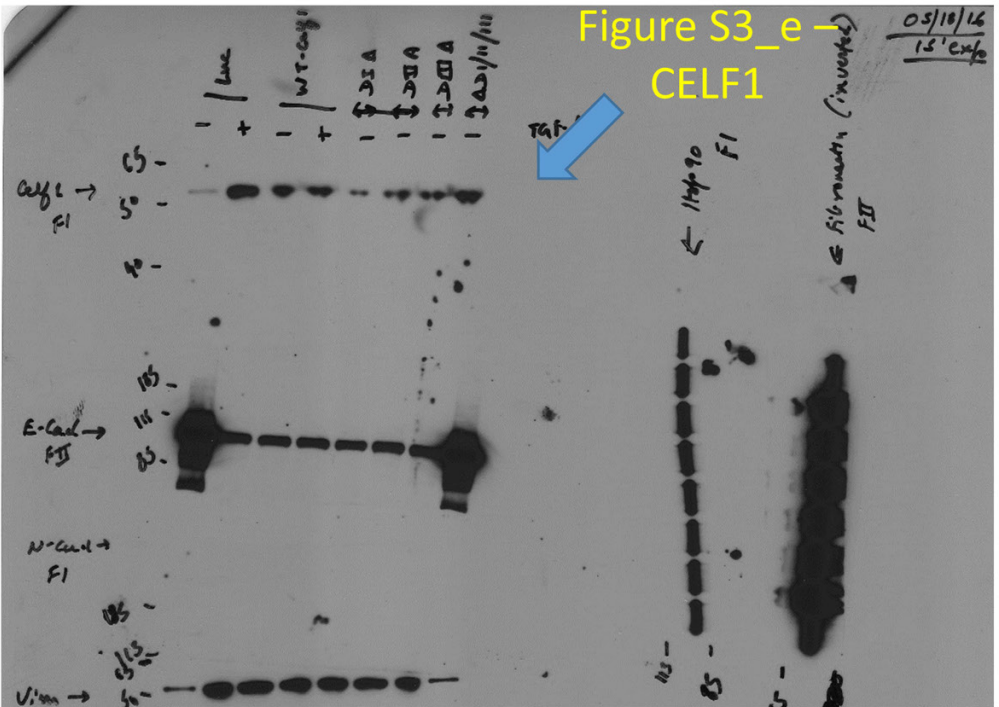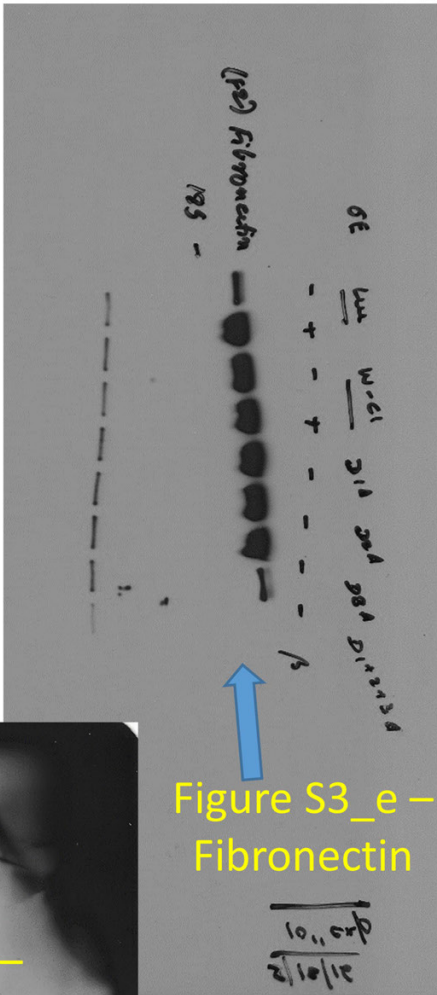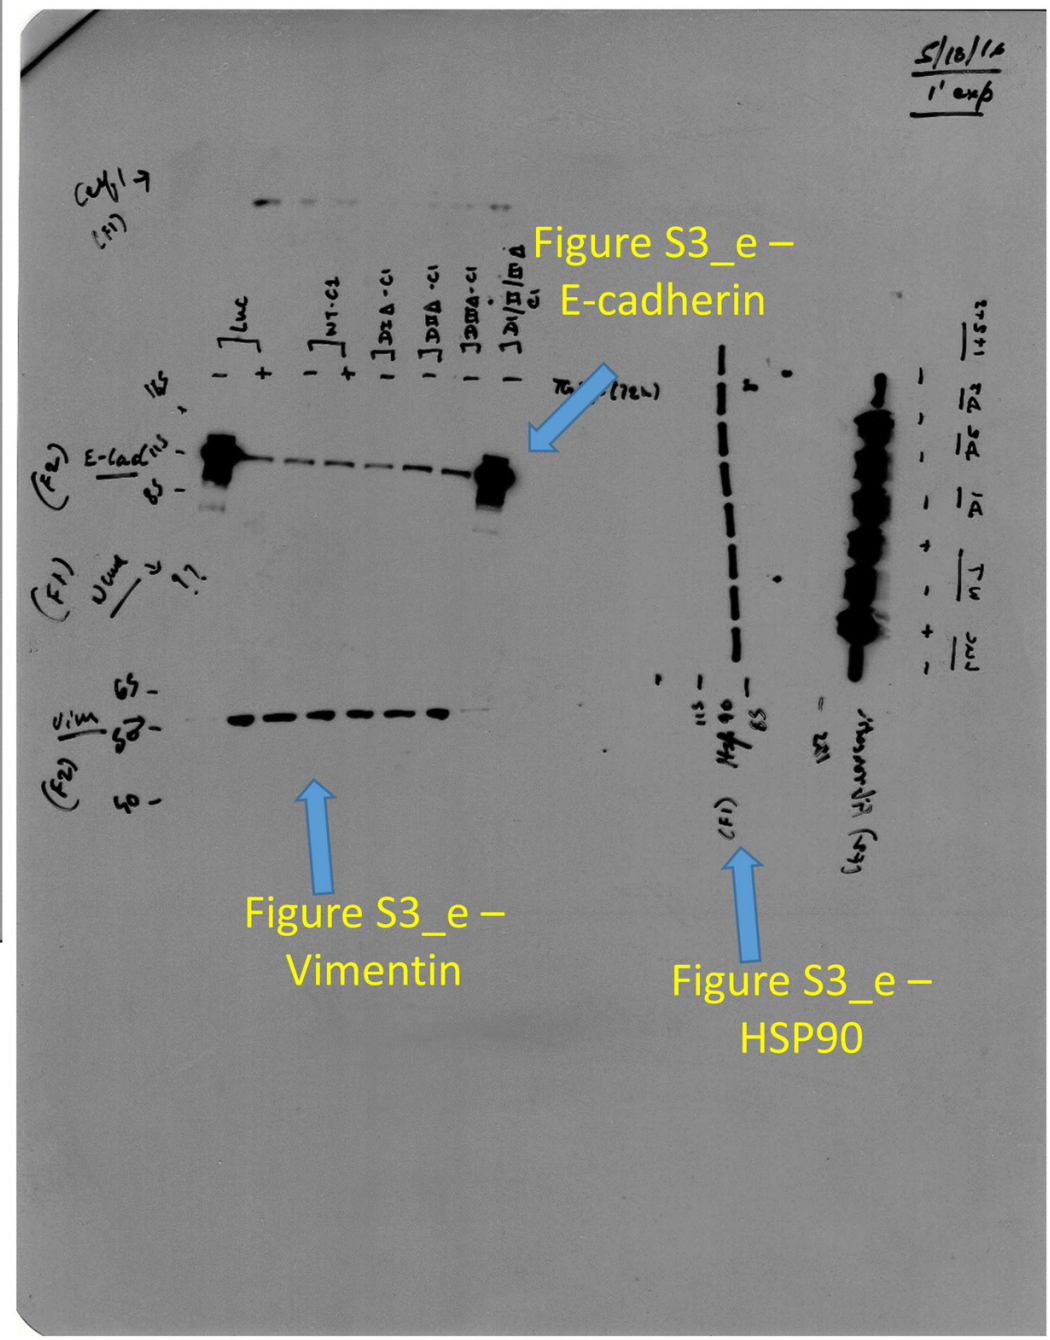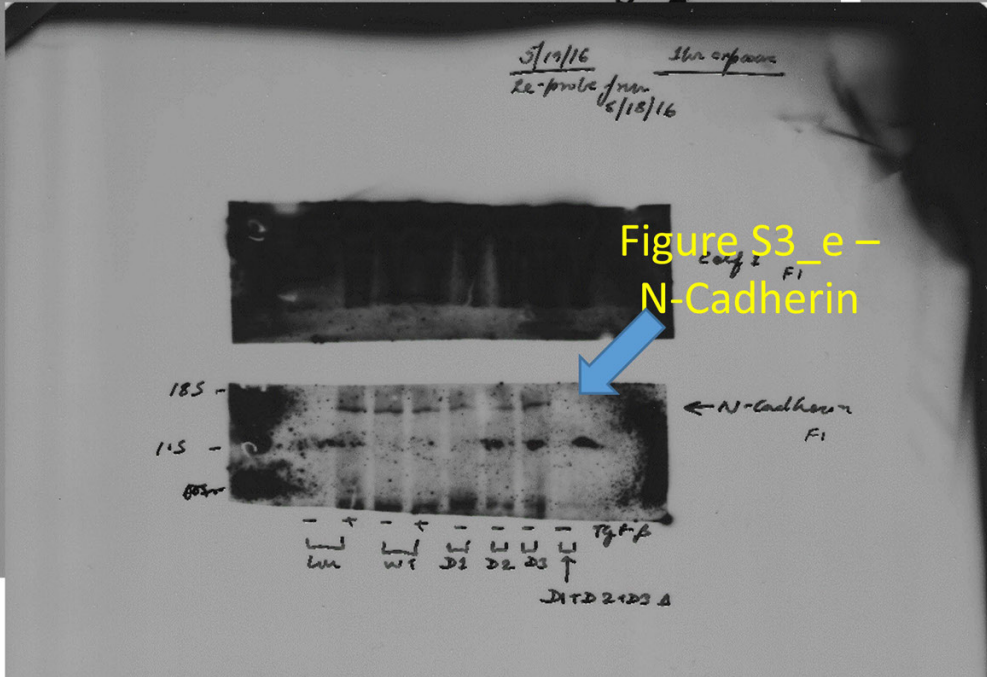

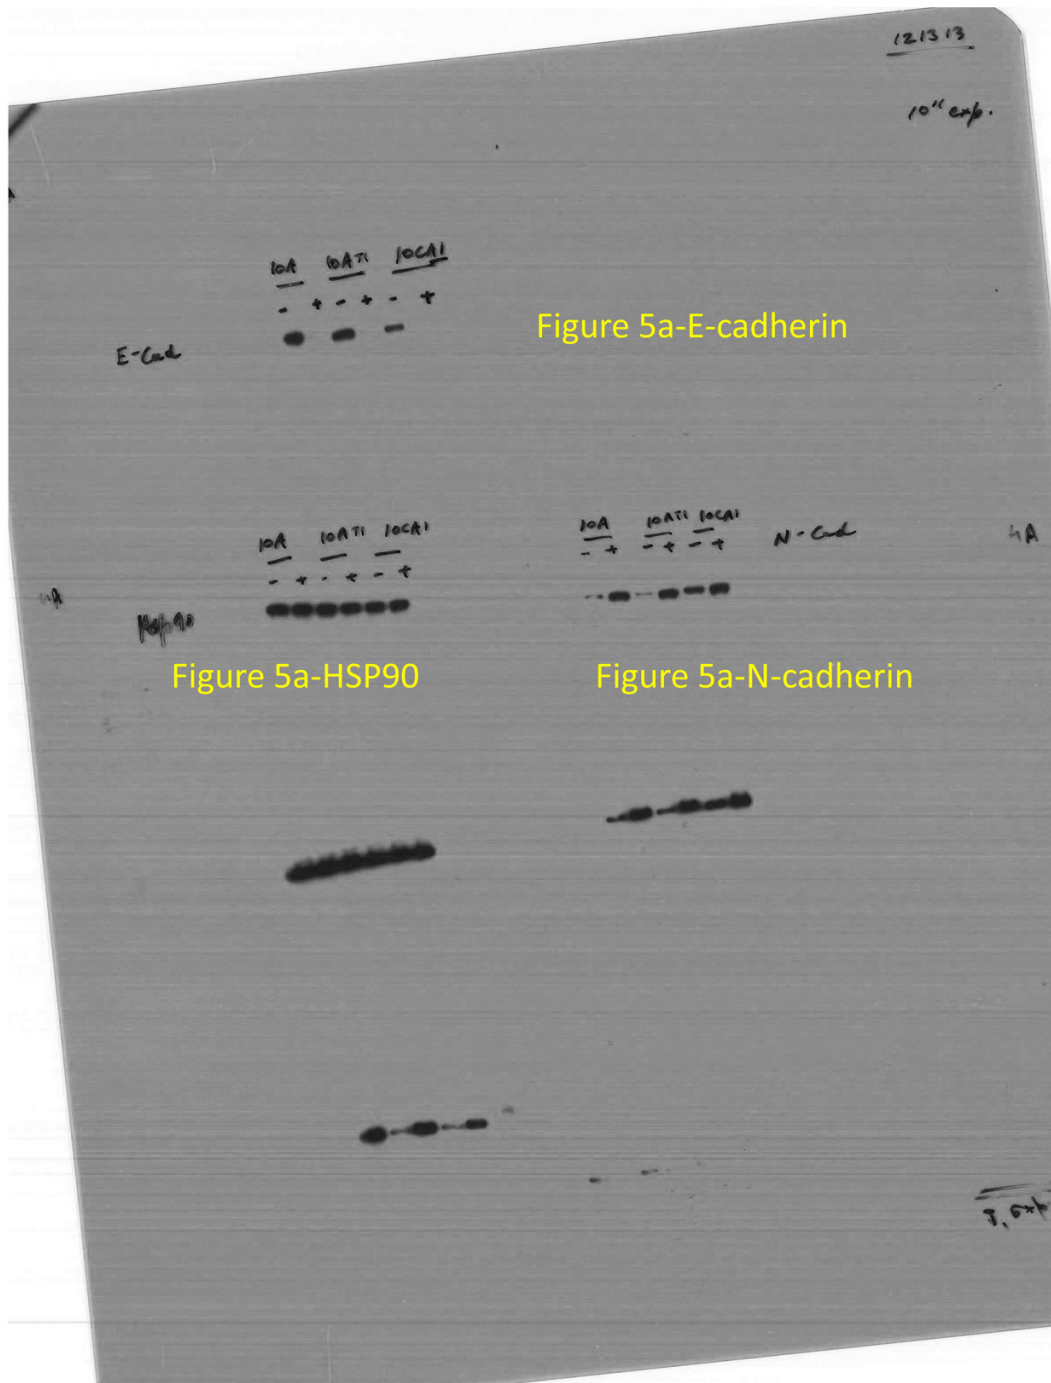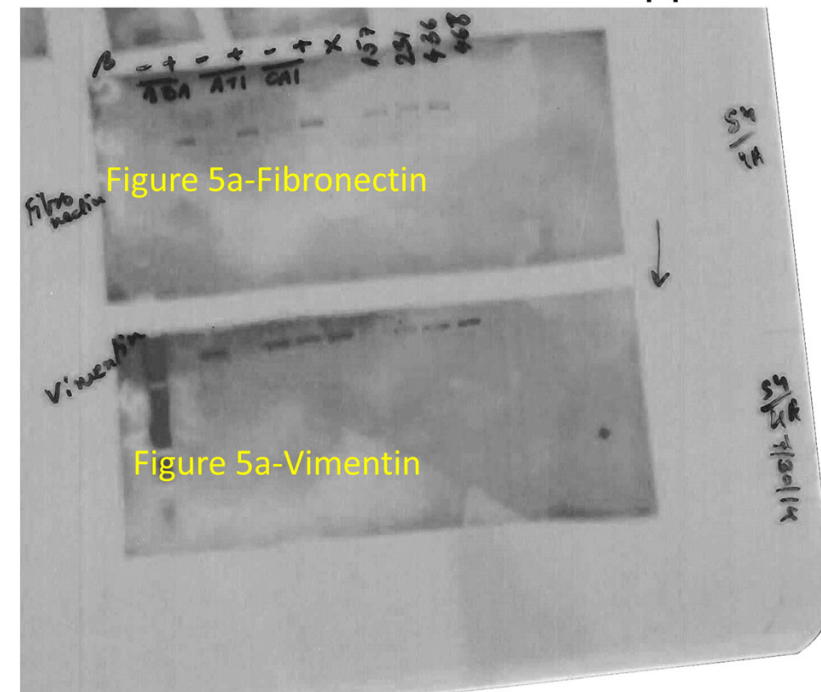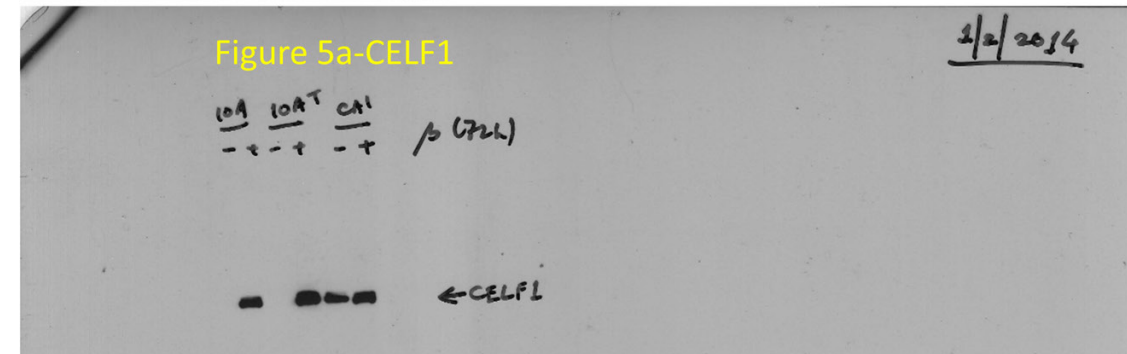

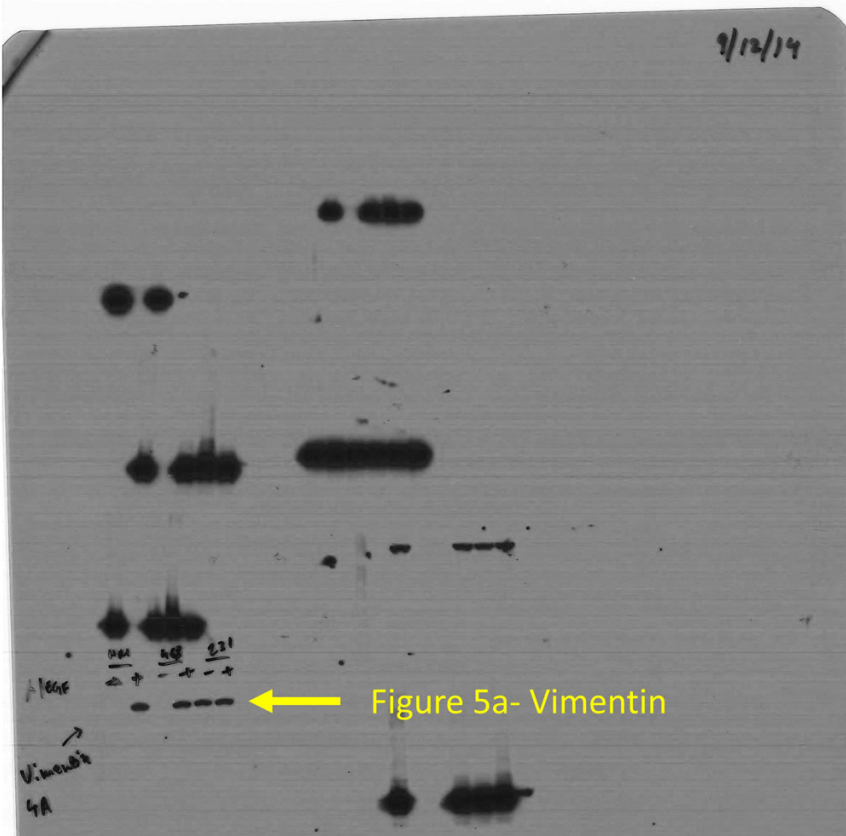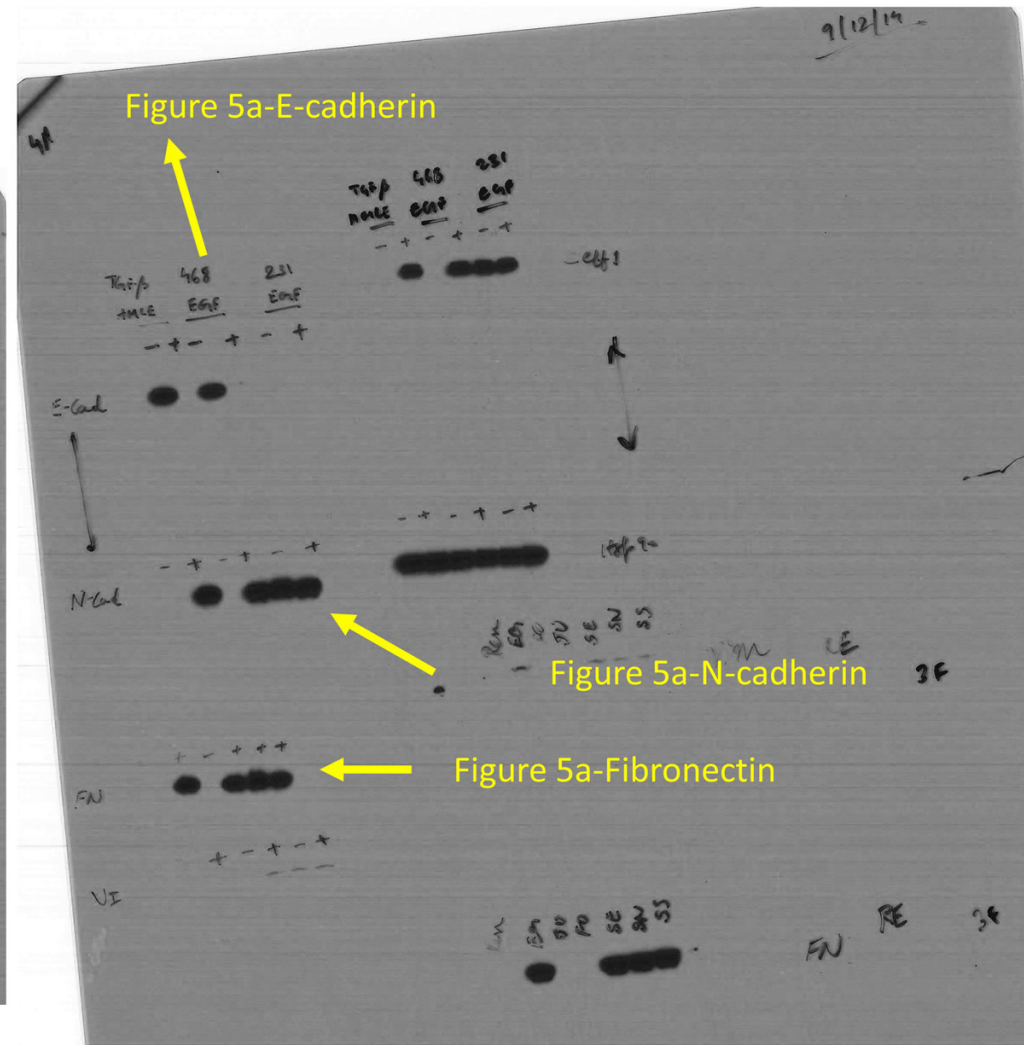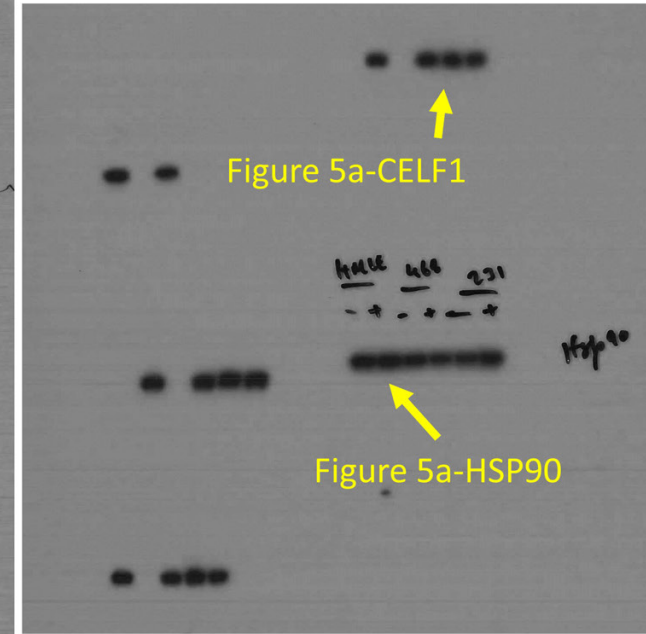

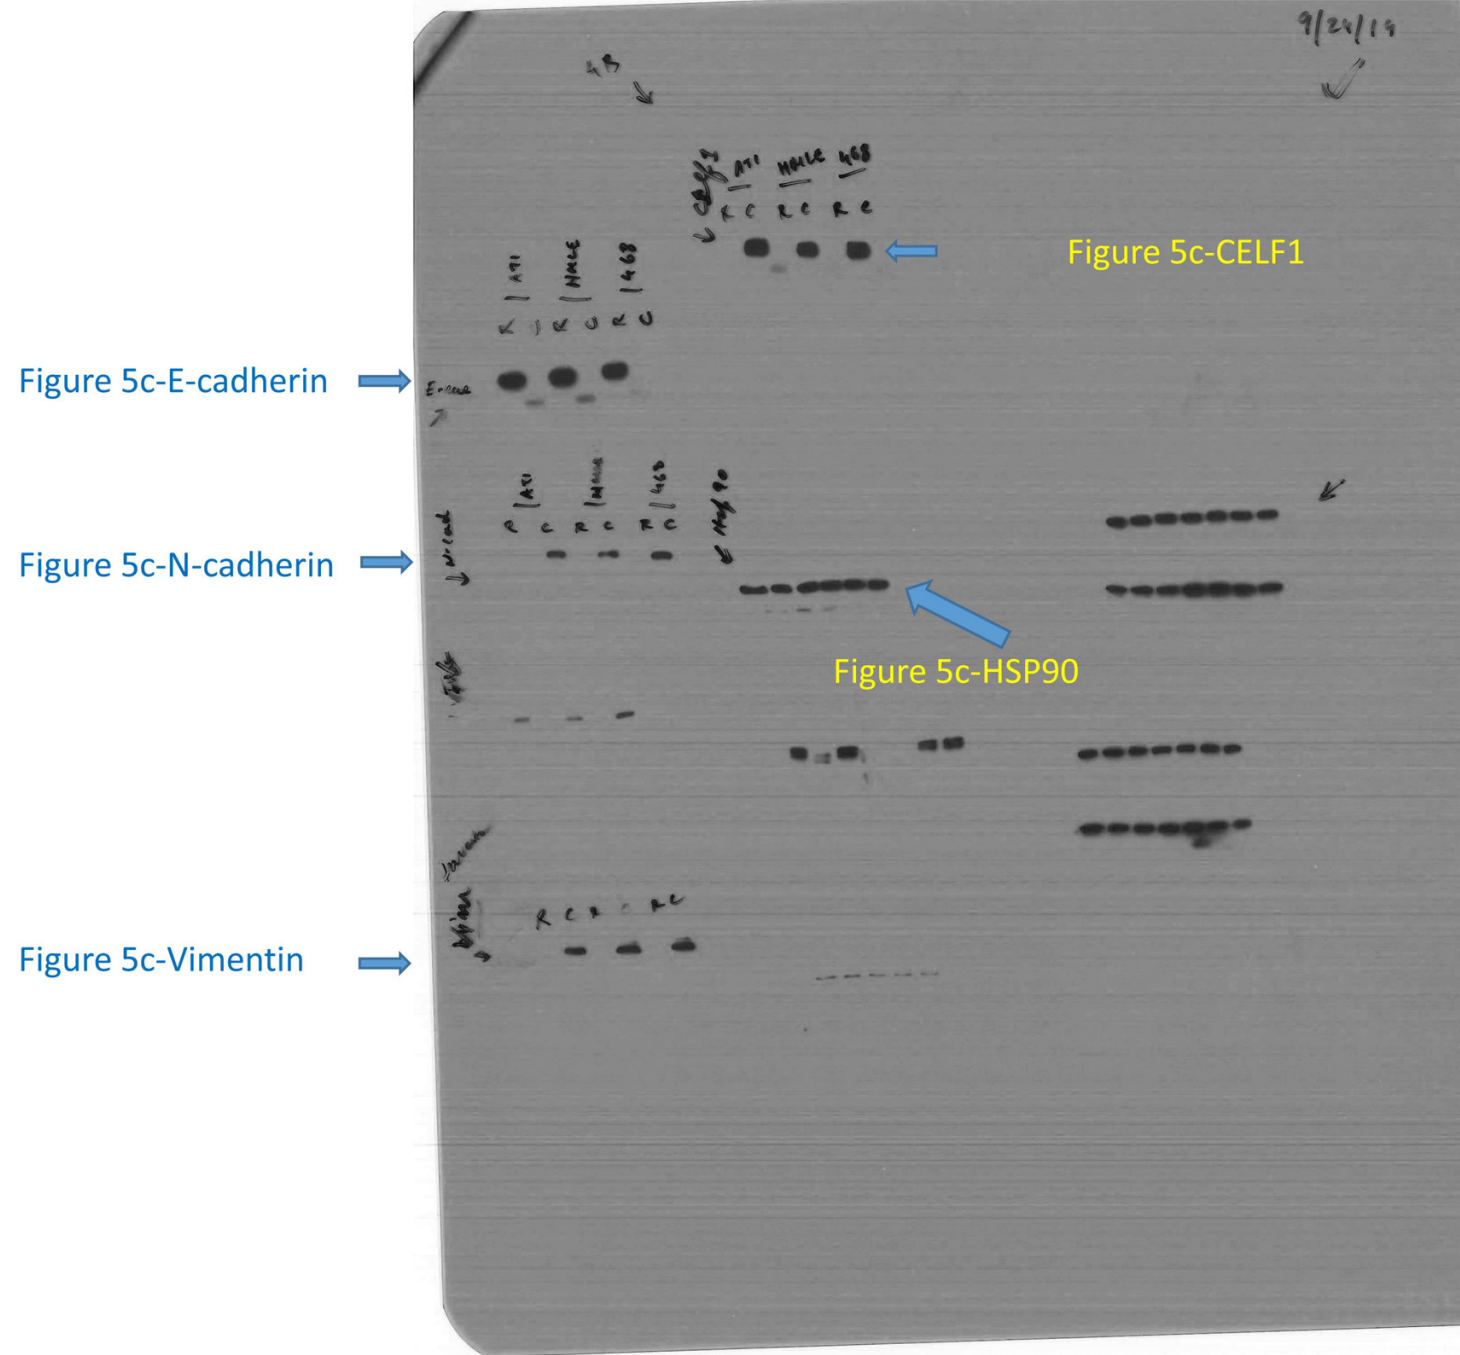



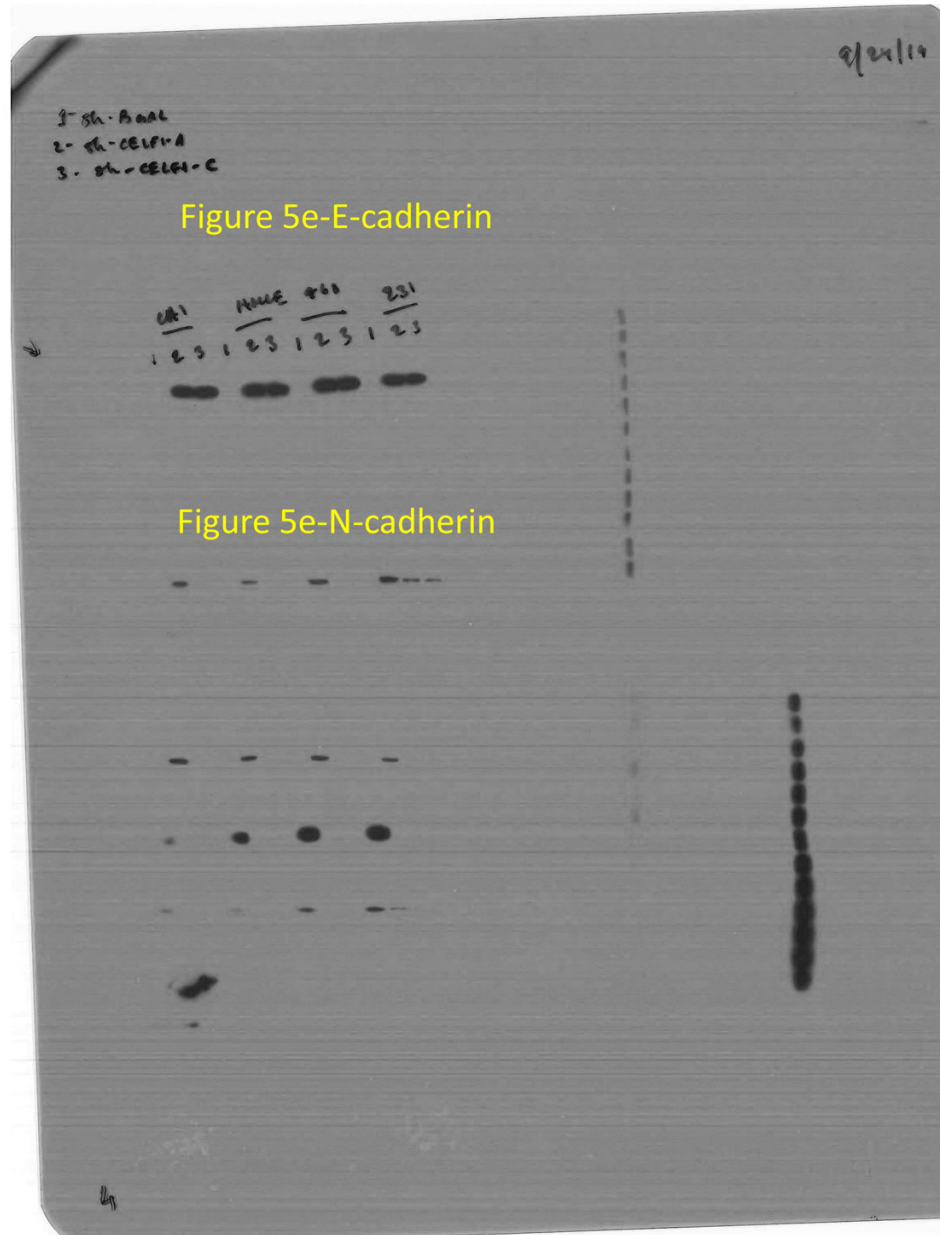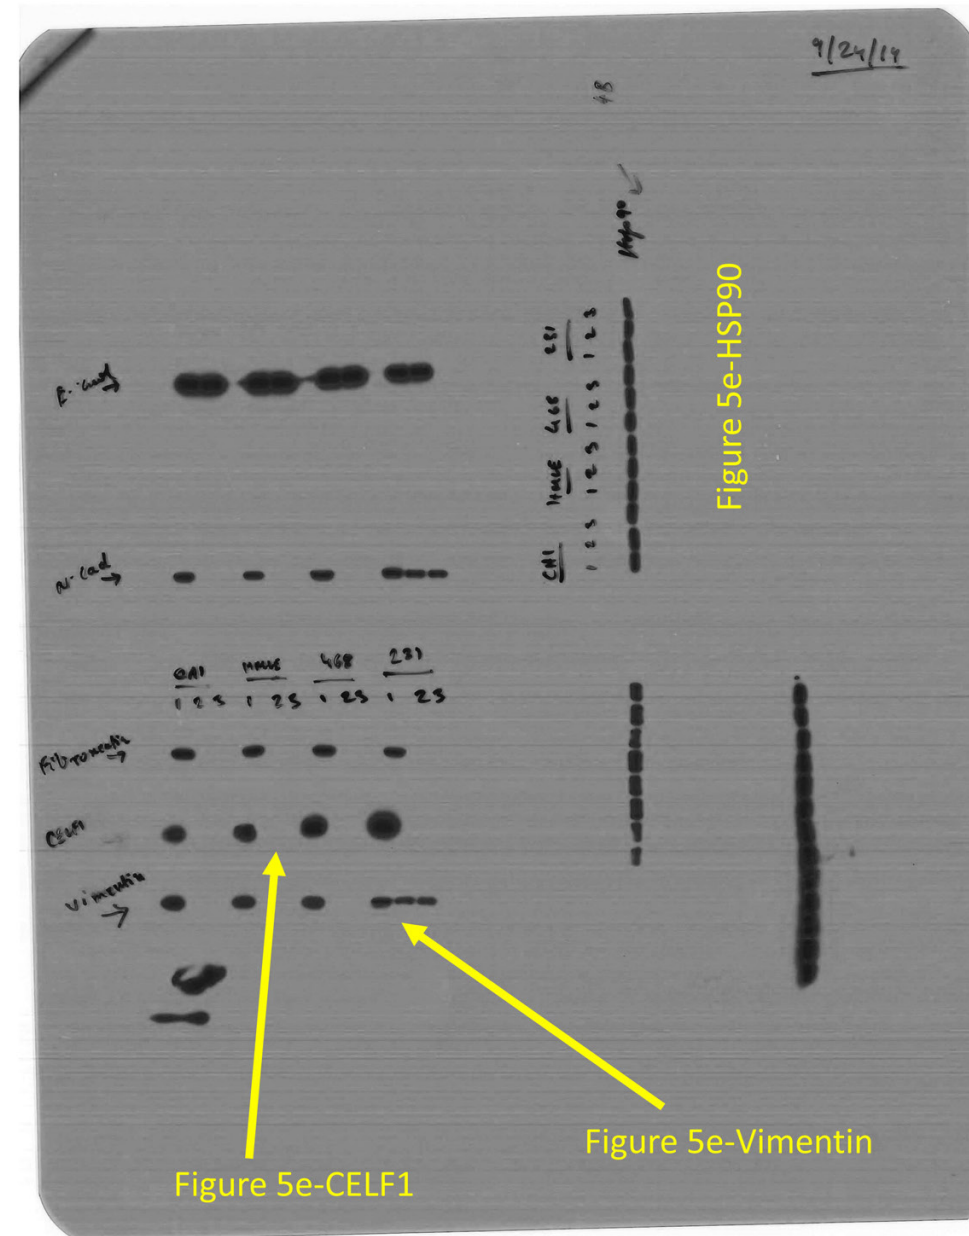

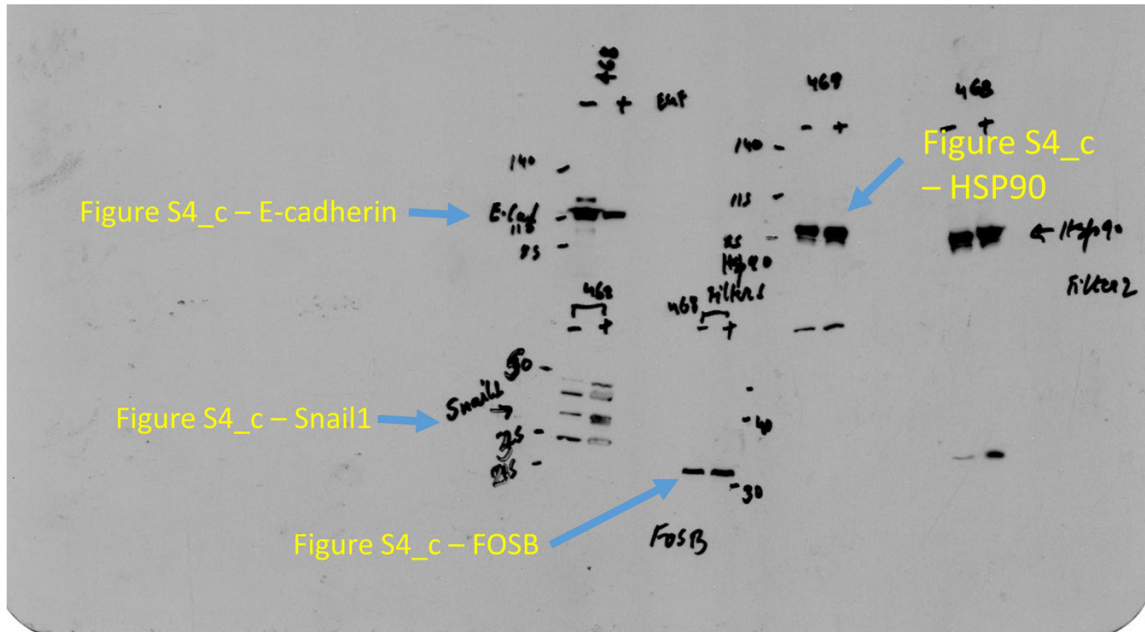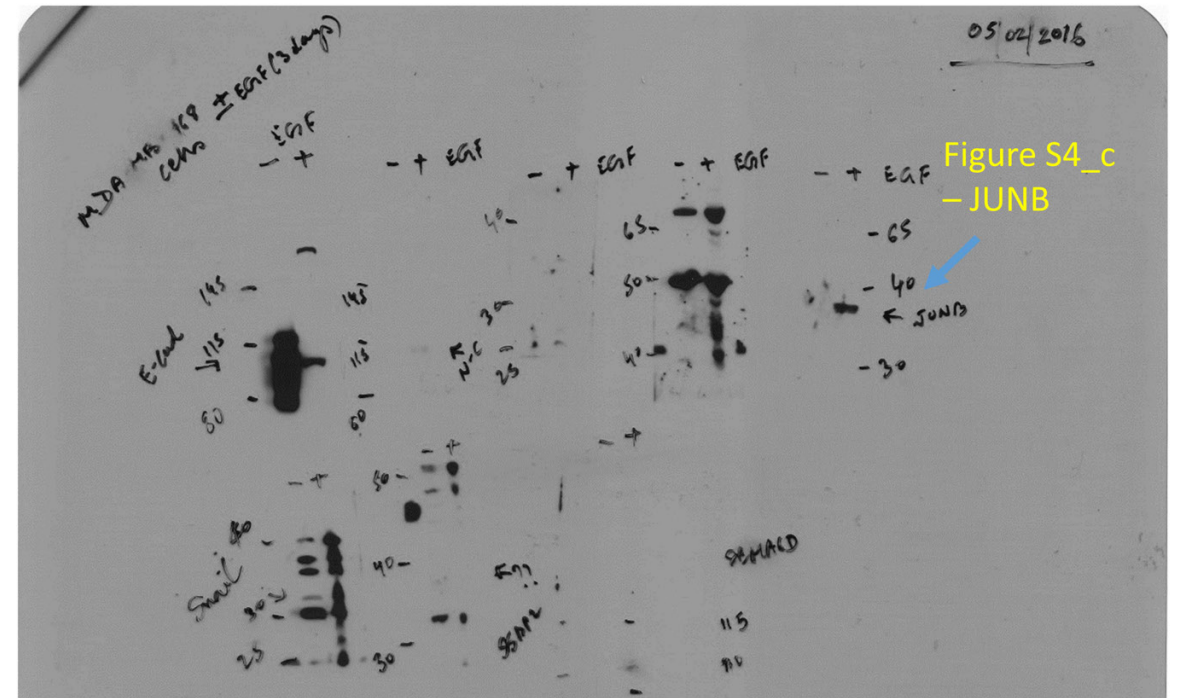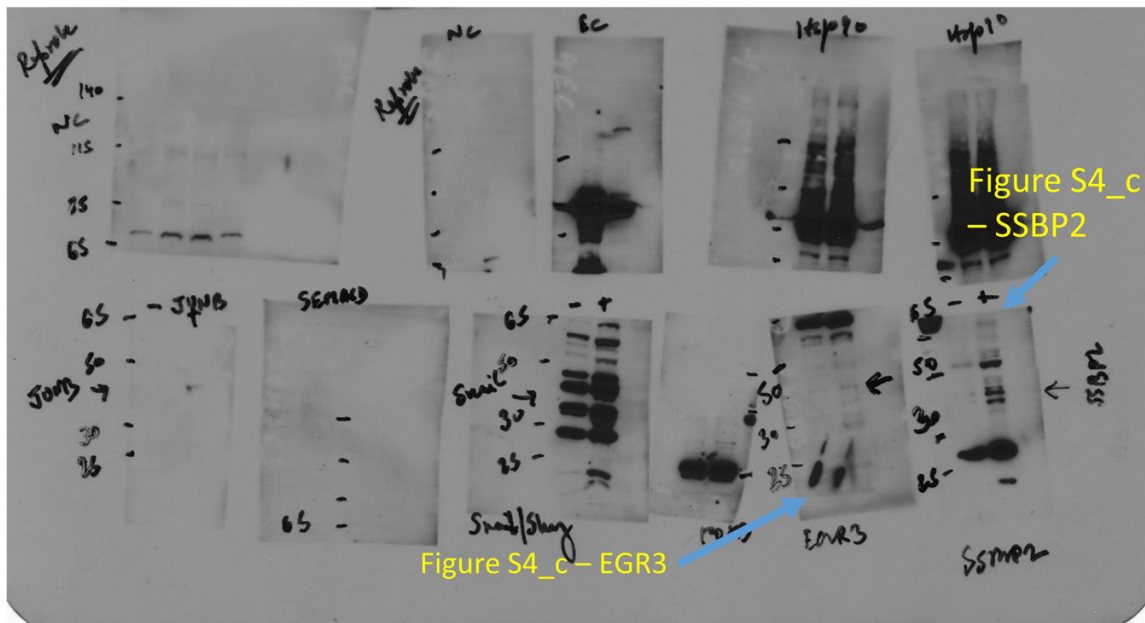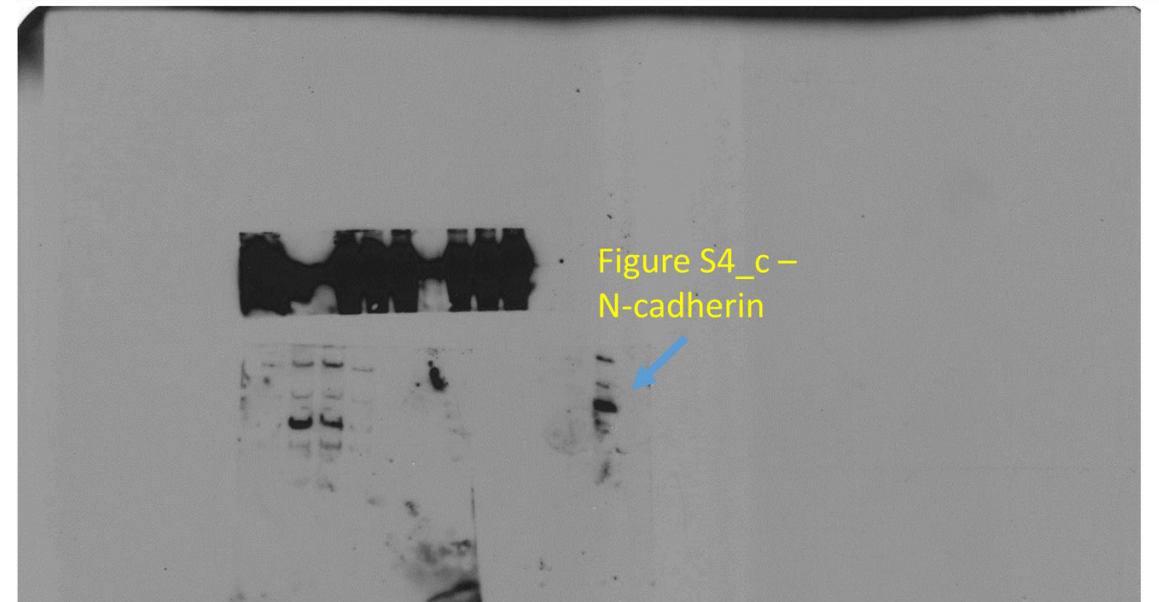

4/23/19

Figure S4\_d  
E-Cadherin

Figure S4\_d  
HSP90

Figure S4\_d  
N-Cadherin

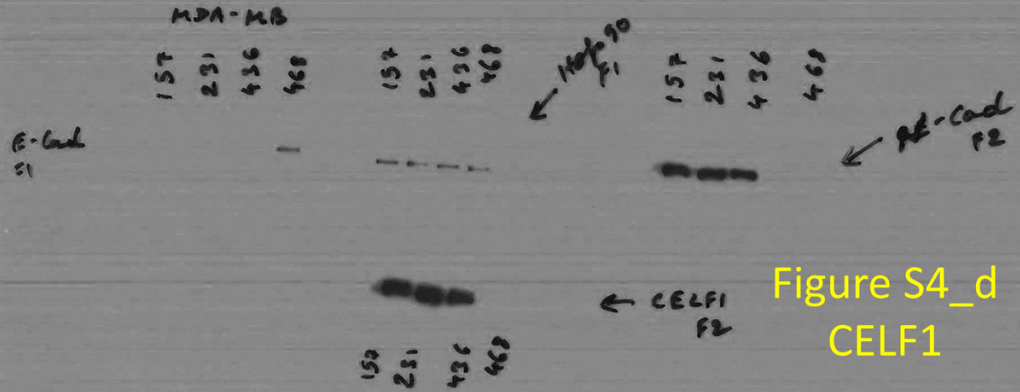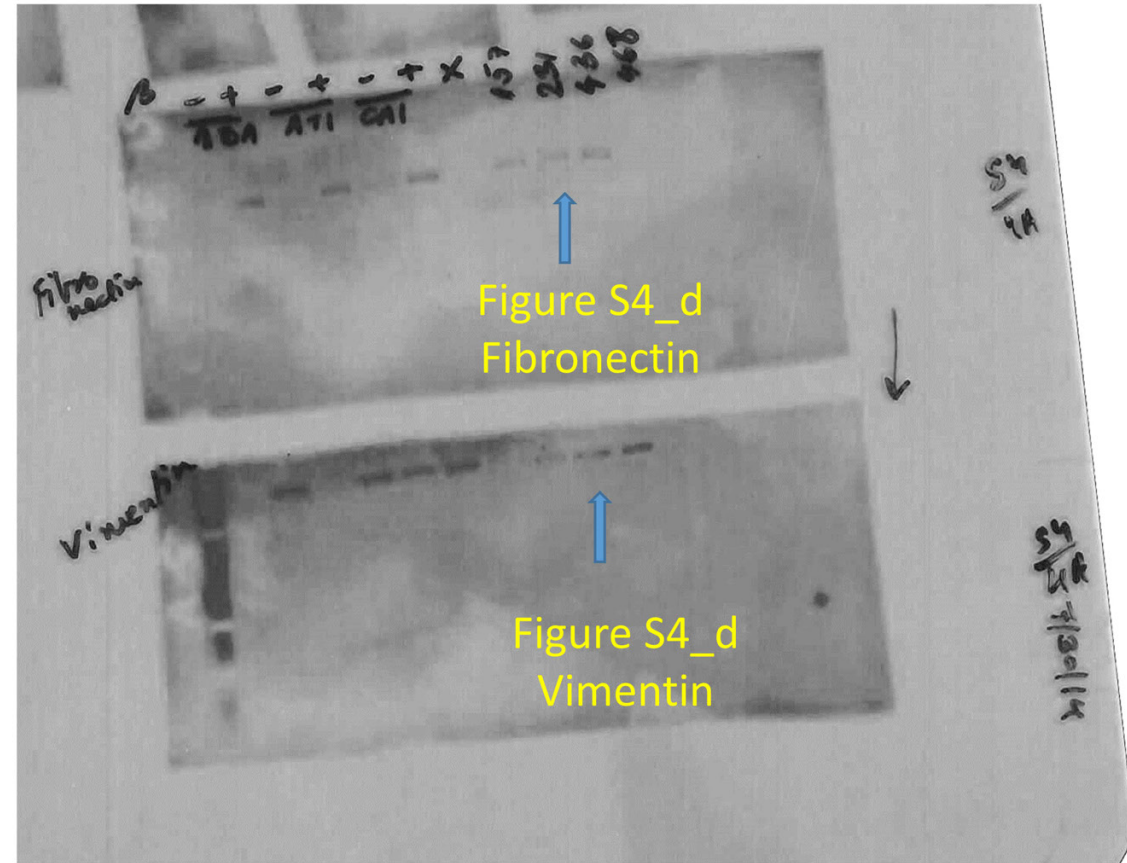

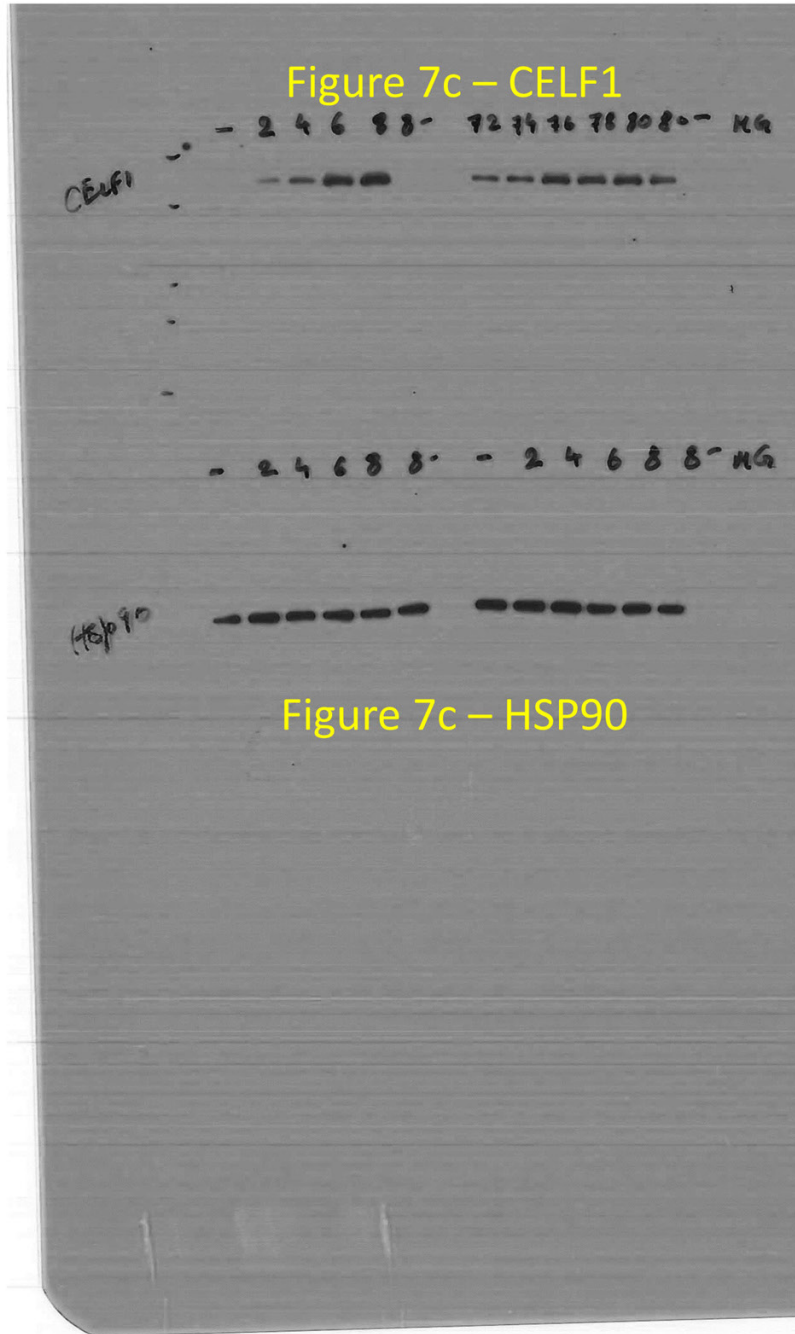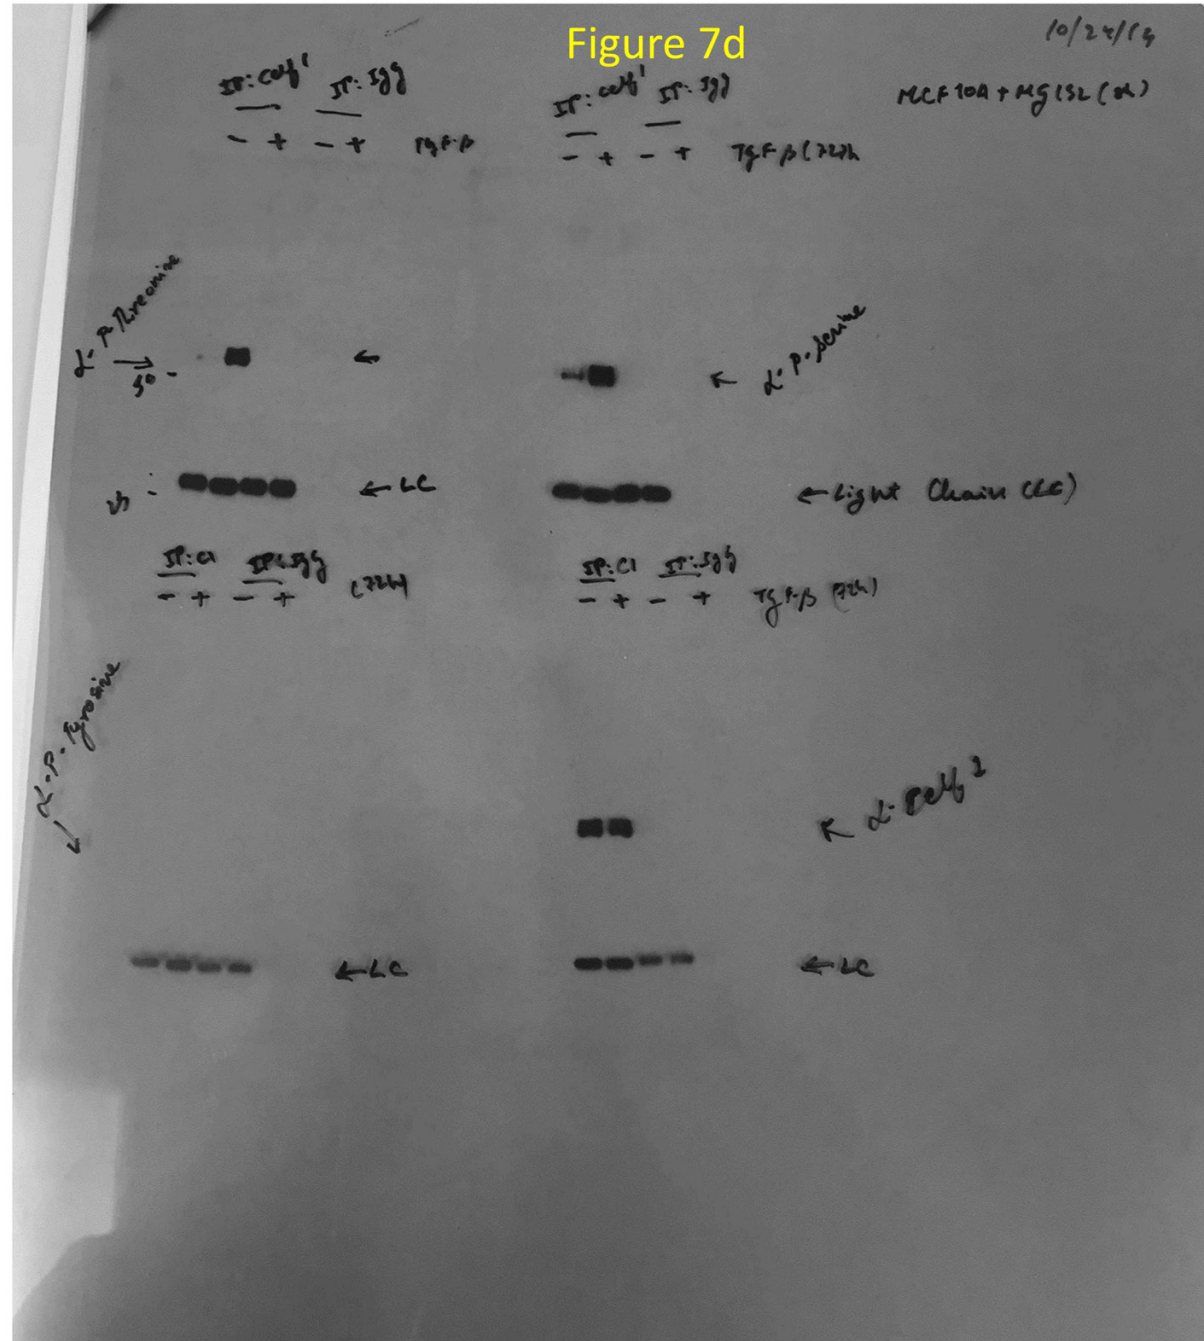

**Supplementary Table 1. Oligonucleotides used in the current study.**

| <b>pBUTRs</b>    |                                                                                        |                                                                                           |
|------------------|----------------------------------------------------------------------------------------|-------------------------------------------------------------------------------------------|
| <b>Gene</b>      | <b>Forward primer (5'-3')</b> (preceded by <i>attB2r</i> -ggggaccagctttctgtacaaagtggg) | <b>Reverse primer (5'-3')</b> (preceded by <i>attB4</i> – ggggacaactttgtatagaaaagttgggtg) |
| <i>ADSSL1</i>    | TTTTAGTCACAGACTGAGCTGATC                                                               | ACACTGCTTCGGCTGGAC                                                                        |
| <i>AGAP6</i>     | GTGTAGTATCTGTTTTATTTGACTGCAG                                                           | GGCAGAAGGACATAAAAATACGTCTTAT                                                              |
| <i>ALOX5AP</i>   | CCCTAACTCTCTGCTGAATATG                                                                 | TTAAGAAAACACAAACCTGGTC                                                                    |
| <i>ARHGAP25</i>  | GCTTAAGGGTCCCAGGA                                                                      | TGAATATAATTTTCTCATCAATTTTGCTGCATA                                                         |
| <i>ASF1A</i>     | ATGTGACCACCTACCATCC                                                                    | TTCATTTTAATATTTTAACATTTTCTTTTAATTGCAATTAGACAA<br>ATG                                      |
| <i>AZGP1</i>     | AGCTAGGAAGCAAGGGTTG                                                                    | AGCTTCTACAGATTAGACAATGGG                                                                  |
| <i>C12orf35</i>  | AAATAATTACAAGATGTGGTTTTGTAATTGCC                                                       | TCAAGTATGAAAAGTAATGTTTAAACGTTGTC                                                          |
| <i>C14orf142</i> | TCTTAAACAATAGCCTTCATGACATTTAAAAGAT                                                     | TTTAAAAGGATTCAATAATCTTTTAAAGCAAAATCAAAGTAT                                                |
| <i>C16orf87</i>  | CTCTGATACTTGTTTGCAAAATCTGC                                                             | TTTTCTTCCAGATTGAAAGTAACAATTTAAATAATTATCAG                                                 |
| <i>C4A</i>       | GTGTGAGGGCTGCCCT                                                                       | ATGCCCTGGTCCCAGG                                                                          |
| <i>CBWD6</i>     | ACATAACACTAGAGGCATTTCTTATCAAAAGG                                                       | TCATGTCATAAAATGGTGACACTTACTT                                                              |
| <i>CCDC59</i>    | TGTTAAACATTTTGTCTACAGGTTAAAATATCTG                                                     | ATTCAATATTTGGCAAGTATTATTGGTCAGC                                                           |
| <i>CCNL1</i>     | CGCTGACTTTCTTCTCCTTTGA                                                                 | TCCTTGTA AAAATCTTTACACATGCAGAC                                                            |
| <i>CEBPZ</i>     | AAATGAGTTATTAATGTAAATTATAGATTA AAAATTCTACTT<br>ACATCTAATT                              | ACAAATCCACTGAGAAGTCTGG                                                                    |
| <i>CRABP2</i>    | GAGTGAGTGGCCACA                                                                        | AAAATTAACAAATAAATATTCTAAACTGTA                                                            |
| <i>CRLF1</i>     | AGATAAGCTGTAGGGGCTCA                                                                   | TAAAAGGACTCTTTTGGAGGG                                                                     |
| <i>CXCL14</i>    | GAATAGGGTGAAAAACCTCA                                                                   | ACTTCCATCTTAGAAAAGAATATG                                                                  |
| <i>CYP4B1</i>    | AAGTAGCTCTGATGAGAATG                                                                   | ATTTTGTACAGTCTTCATTTAGG                                                                   |
| <i>DBNDD2</i>    | AGCTAGCAGTGGGCCC                                                                       | CCGTGCTCTGTTCCAAAAA                                                                       |
| <i>DUSP2</i>     | CACTGAGGTGGTGCC                                                                        | GACATATCCTGAATGTTCTGTAT                                                                   |
| <i>DYNLT3</i>    | CTTTAACTGACTAAAAATGTTGGGCTAAAGC                                                        | ATATTTTAACTAGAAACAGAGCAGATAGCAAG                                                          |
| <i>EGR2</i>      | CCTTGAGATGAGACTCAGGCT                                                                  | TACACTATAGTCACAAACCATCCA                                                                  |
| <i>EGR3</i>      | GCCTGAGGATCGGG                                                                         | AAAACAAAGGAAAACCTCAATTATC                                                                 |

|                 |                                         |                                                      |
|-----------------|-----------------------------------------|------------------------------------------------------|
| <i>EGR4</i>     | CTCTGAGCAAGAGATGGGTTT                   | GCAAAAATAAACAGTTTTGTCAACTG                           |
| <i>FAM206A</i>  | TCATGAGGATTGACATGGAACAAAA               | TAAAAACAGTGATATTGACATGTATGTTATAGCC                   |
| <i>FGFR1OP2</i> | AGCTGAAGAGTTTCTGAGTCTGT                 | AGCAGGGATAAGAAGTATCTGAATGAAT                         |
| <i>FOSB</i>     | CTGTGAACTCTTTAGACACACAAA                | GGCAACAGTGCAGAACCAA                                  |
| <i>GGCT</i>     | CTTTAGAACATAACAGAATATATCTAAGGGTATTCTATG | CCTCTAAAAACAGTATACCATCTTTCCAAT                       |
| <i>GLIPR2</i>   | AAGTAACTTGTTAAATGTAATGGG                | GTCTTCTTAGTCAATATCCCT                                |
| <i>GPR1</i>     | CAATAAGTTATTACTTTTCCACAA                | TATCTATTTTATTTATTTATTTTGGAGACA                       |
| <i>HDFGRP3</i>  | ACCTAACTACCATAATGAATGCTGC               | GTCAGCTTGCTGTGAACAATTTTT                             |
| <i>HIST1H4K</i> | GGTTGAGCGTCCCTTTC                       | TGGGGGCCCTAAAAAGG                                    |
| <i>HSPB1</i>    | AAGTAAAGCCTTAGCCCCG                     | TGAGAAAAACAGAAGATAAATGTATC                           |
| <i>ING2</i>     | AGGTAGTAAAGGCCATCCACATTT                | ACACCATTAATACTAATGATTAATAAATTATTGCATAGTCTTAT         |
| <i>INSIG2</i>   | GAATGAAGAAGGCAAAAAATATCTTTTGTACA        | ACGTGTTGCTTTTAACAGCAATTTT                            |
| <i>JUNB</i>     | TTCTGAACGTCCCCTG                        | TAAATAGATTCAATAAAAAAGAACAACAC                        |
| <i>KLK7</i>     | CGCTAACGCCCACTGA                        | TTTCATGTTATAAAAGTGCACATTCAAGG                        |
| <i>KRT4</i>     | CGATAGAGGAGACGAGGT                      | GAAGATTCACCTGCAGATGG                                 |
| <i>LTF</i>      | AAGTAAAACCGAAGAAGATGGC                  | TCTTGCTAAGACGACAGCAG                                 |
| <i>MME</i>      | TGGTGATCTTCAAAGAAGCA                    | TTGTATTTTGGAGACTGGAACTG                              |
| <i>MRPL42</i>   | AGATGATGCGGAGGTTC                       | ACTTTTGGAGGCCAAGGTG                                  |
| <i>MTRNR2L5</i> | GTATAAATAAATAGGAGAAGACCCTG              | TTTGTGAAGTGGGCC                                      |
| <i>NUF2</i>     | ACCTGATTAACAAAATTACATGTCTTTTTGT         | TAATTATAAATTAATAAAAGCCTACATTAATTCATCTTATTAAC<br>TACT |
| <i>PADI2</i>    | CCCTGACCTGCCAG                          | TCATTGTTCTTTAGTCGAGC                                 |
| <i>PCNP</i>     | AATTAATGATGTTTTGAAATTGGGGTGTG           | GGTACTTTAGTAAAGACATTTCATCTCAGT                       |
| <i>PDZK1IP1</i> | ATGTAACCTTCTCTGTGGCTC                   | TCACAGAAATTAGGGCCATTTT                               |
| <i>PLK4</i>     | CATTGATTAAACTCCTTTCAGACATATAAG          | TTTTTATAAAATGCATTTGCAAAAATGTTTCATCA                  |
| <i>PNN</i>      | CGTTAATGGAAGAAGCCAGGCTTT                | AATTACTCCAATAAAAGGATTTTTAAAAAGAGATCT                 |
| <i>PPARGC1A</i> | AGGTAACATGTTCCCTAGCTGAG                 | AGCTCAGTGAGGCTGATGT                                  |
| <i>RBX1</i>     | CACTAGGAAAAGACTTCTTCCATCAAG             | TGACACAGAATACAATATGGCTACAGAAAC                       |
| <i>RHOB</i>     | CTATGAGGGCCGCG                          | TAAAAAATAAAAAACAAGACAACAATTT                         |

|                |                                         |                                            |
|----------------|-----------------------------------------|--------------------------------------------|
| <i>RNF6</i>    | TGGGTAAGGTGATGGGATCT                    | GGTAGAAACAGATCTTCAATGCATACTTT              |
| <i>RNFT1</i>   | TATTAAGTTGTATAAACTATCAAGGCCACAAAATA     | CTGAAAACAATGTCAGGAAAGAATACC                |
| <i>SEMA6D</i>  | ACATGAATGTCCTCATCACCTG                  | ATTAATCTGTAATATTTTAGTTGCAAAGCTGA           |
| <i>SNAI1</i>   | CGCTGACCCTCGAG                          | GAATATCAATAAACTGTACATATAACTATA             |
| <i>SPRR1B</i>  | AAGTAATGTGGTCCACAGCC                    | GGGGGTATAAGGGAGCTG                         |
| <i>SSBP2</i>   | GTGTGATCCATTACCAAGTCTC                  | GCTATGGTCTAAATGATTTGGGC                    |
| <i>SUMO1</i>   | GTTTAGATATTCTTTTTATTTTTTTCTTTTCCCTCAATC | CAACATGATTAGGTAAGTGTATCATATATGCA           |
| <i>SUV39H2</i> | AACTGAACCTTTTTCAGGAAATAGAGCT            | TTTATACCTTAAATTTCTTTATCATTGAGGTGCC         |
| <i>SYS1</i>    | GTCTAGAATCAGGCCCTTG                     | CCTAAATCTTCATCCTGTCAG                      |
| <i>TAPBPL</i>  | AGCTGACCTAAAGCGACATG                    | CTGAACAAAGGCAAAAAATACAAATT                 |
| <i>TCEAL4</i>  | GTGTAGTGTCCCTGGCA                       | ATTTTTATGACTAAAGAAATCTGTTTTTAGGAG          |
| <i>TICAM2</i>  | GCCTGAGATGAAACATATAACATGTG              | TTTAAGAAAGCCTGAGTAAGCATG                   |
| <i>USP49</i>   | GGTTGATTTGTCCACATTTTATTGTTTTCT          | TATTTGAGTCAGGATCTCACTCTGTTG                |
| <i>WBP4</i>    | CAATAGTTGCAGGAGAGCTTTTTG                | AAGCTTTTTTCTTACATGTACAGTCATCTTAA           |
| <i>WISP2</i>   | TTCTAGAGCCGGGCTG                        | CAGGAACAATTTTACAAACTCCAGA                  |
| <i>XPA</i>     | ATGTGATTTTTTAGTTCAGTGACCTGT             | TCTGCTATTAGGGCTTTTTCCAG                    |
| <i>ZNF107</i>  | ACTTAATTGATCCTACAAGCTTACTACAC           | ACATAAAAGTACAAATAGTAAATGATATACTACTAATTCATT |
| <i>ZNF14</i>   | GTCTAAGAATATAAGCAACATTCTGAAGC           | ACTGGGCTGTTTACATGATACTTT                   |
| <i>ZNF800</i>  | GTCTGATAACTTCAAGTGATGTACGAAA            | AAGACCTTGTGGATCTTTAACA                     |

**pBUTR - Site**  
**Directed**  
**Mutagenesis**

| <b>Gene</b>         | <b>Forward primer (5'-3')</b>                                     | <b>Reverse primer (5'-3')</b>                                     |
|---------------------|-------------------------------------------------------------------|-------------------------------------------------------------------|
| <i>CRLF1_Mut.</i>   | ACCTTTGGGTGCACCCCAAGGTTGGTTGAG                                    | CTCAACCAACCTTGGGGTGCACCCAAAGGT                                    |
| <i>DUSP2_Mut. 1</i> | CTGGGGACTTGGGAAGAGCCTTTCACACCTGT                                  | ACAGGTGTGAAAGGCTCTTCCCAAGTCCCAG                                   |
| <i>DUSP2_Mut. 2</i> | ACAACCAGGAGCCCTTCGTCTGCCCAGG                                      | CCTGGGCAGACGAAGGGCTCCTGGTTGT                                      |
| <i>JUNB_Mut.</i>    | ACTTAGTCTCTAAAGAGTTTATTTTAAAGACTTCTTTTTATTG<br>AATCTATTTAGTGGGTTG | CAACCCACTAAATAGATTCAATAAAAAGAAGTCTTAAAAATAAAC<br>TCTTTAGAGACTAAGT |
| <i>SNAI1_Mut.</i>   | GATTCCTGAGCTGGCCATCCAGAGCTGTTTGG                                  | CCAACAGCTCTGGATGGCCAGCTCAGGAATC                                   |

---

**qRT-PCR**

---

| <b>Gene</b>     | <b>Forward primer (5'-3')</b> | <b>Reverse primer (5'-3')</b> |
|-----------------|-------------------------------|-------------------------------|
| <i>ACTB</i>     | ACCCAGCACAATGAAGATCA          | ACATCTGCTGGAAGGTGGAC          |
| <i>ATF3</i>     | GTGTCCATCACAAAAGCCGA          | AGGCACTCCGTCTTCTCCTT          |
| <i>CRLF1</i>    | CCCAGATCTCATAGGGCGTA          | GAGACCTTCTCCACACCAA           |
| <i>CYP4B1</i>   | ATCTACTGGCTCACCCACACA         | ATGTCCAGGAAGTCCAGGTG          |
| <i>DUSP2</i>    | GCCTCCGCTGTTCTTCAC            | AACCACTTTGAGGGCCTTTT          |
| <i>DYNLT3</i>   | TGGACTGCAAGCATAGTGGA          | CTCTTCTGGACCACTGCACA          |
| <i>EGR3</i>     | GACAATCTGTACCCCGAGGA          | TCCCAAGTAGGTCACGGTCT          |
| <i>EGR4</i>     | CAAAGCCCAGCTCAAGAAGT          | TGCTCCACCTTAGCGAGTTT          |
| <i>FOSB</i>     | TCTGTCTTCGGTGGACTCCT          | GAAGGAACCGGGCATTTC            |
| <i>GLIPR2</i>   | CACAATGAGTACCGGCAGAA          | AGCCACCTCCTTTCCTGTCT          |
| <i>JUNB</i>     | AGCTACTCCCCAGCCTCTG           | GGAGGTAGCTGATGGTGGTC          |
| <i>KLK7</i>     | TGCACGAAGGTTTACAAGGA          | GGGTACCTCTGCACACCAAC          |
| <i>KRT4</i>     | ATTCTCACCTCGCTGCTCTG          | TTGCAGAGCTCAACAGGATG          |
| <i>MALAT1</i>   | GAATTGCGTCATTTAAAGCCTAGTT     | GTTTCATCCTACCACTCCCAATTAAT    |
| <i>MTRF1</i>    | GCACTGGAAGAAAGGCAAAC          | GTCCTTCCAGCTGTCACCTC          |
| <i>NR4A1</i>    | TCCTGGAGCTCTTCATCCTC          | GGCCAGGATACTGTCAATCC          |
| <i>NUF2</i>     | GAAAACTTGCCACAGCACA           | TCCCTTTCAGCAGCATCTTT          |
| <i>PADI2</i>    | GCGAATCACCATCAACAAGA          | CTGTCACTCCAGCTCCTTC           |
| <i>PPARGC1A</i> | GGCACGCAATCCTATTCATT          | TGCCTGGAGACCTTGATCTT          |
| <i>RHOB</i>     | GAGAACATCCCCGAGAAGTG          | CGAGGTAGTCGTAGGCTTGG          |
| <i>SEMA6D</i>   | ATGAGCCCTGGTTCACAAAG          | AGGACTGGTCTTTGCCAGAA          |
| <i>SNAI1</i>    | GCGAGCTGCAGGACTCTAAT          | GGACAGAGTCCCAGATGAGC          |
| <i>SSBP2</i>    | TAAGGGCACCATTCCTCTTG          | CCCAGGAAGTCAGCCATTAC          |
| <i>TICAM2</i>   | CCCGGAATAATCTTTGCTGA          | TCCATGCAGACCCATTTACA          |
| <i>WISP2</i>    | ATGAGAGGCACACCGAAGAC          | AGGGGCAGGTACATGGTGTGTC        |

---



---

**RNA-IP/GRE****Mutants****Gene**                      **Primer (5'-3')**

---

|                    |                       |
|--------------------|-----------------------|
| <i>tRFP_For</i>    | TGTCTTGCCCCAGGAGAG    |
| <i>Renilla_For</i> | ATTGAATCGGACCCAGGATTC |
| <i>CRLF_Rev</i>    | CTCAGGTGCCCTGAAGTGAG  |
| <i>DUSP2_Rev</i>   | GGGCTTCTGAAACTCTGAGG  |
| <i>JUNB_Rev</i>    | GTAAACGTCGAGGTGGAAGG  |
| <i>SNAI1_Rev</i>   | ATTCCATGGCAGTGAGAAGG  |

---

**CELF1 –RNA****binding****mutants**

---

| <b>Gene</b>         | <b>Forward primer (5'-3')</b>              | <b>Reverse primer (5'-3')</b>                 |
|---------------------|--------------------------------------------|-----------------------------------------------|
| <i>CELF1_G62C</i>   | ATCAAGATGTTTGTGGCCAGGTTCCAAGGACC           | GGTCCTTGGAACCTGGGCCACAAACATCTTGAT             |
| <i>CELF1_T181G</i>  | CCCGCCTCAGAGCAAAGGGGCCTGTTTGTACATTTTACA    | TGTAAAATGTAACAAAACAGGCCCTTTGCTCTGAGGCGGG      |
| <i>CELF1_G338C</i>  | GACAGGAAGCTGTTTATTGCTATGATTTCCAAGAAGTGC    | GCACCTTCTGGAAATCATAGCAATAAACAGCTTCCTGTC       |
| <i>CELF1_T448G</i>  | CTGATGGCCTGAGCCGAGGTGCTGCATTTGTGACTT       | AAGTCACAAATGCAGCACCTCGGCTCAGGCCATCAG          |
| <i>CELF1_G1322C</i> | GGATTGTCGTAACCTACAAAAGCAAACACTTGCTCAGGTTTG | CAAACCTGAGCAAGTGTGTTTGTGTTTGTAAAGTTACGACAATCC |
| <i>CELF1_Frag1</i>  | AGGATGACGATGACAAGCTTATG                    | GGTCCTTGGAACCTGAGCCACAAACATCTTGAT             |
| <i>CELF1_Frag2</i>  | ATCAAGATGTTTGTGGCTCAGGTTCCAAGGACC          | GTAAAATGTAACAAAACAGGCCCTTTGCTCTGAGG           |
| <i>CELF1_Frag3</i>  | CCTCAGAGCAAAGGGGCCTGTTTGTACATTTTAC         | CTTCTTGGAAATCATAGCAATAAACAGCTTCCT             |
| <i>CELF1_Frag4</i>  | AGGAAGCTGTTTATTGCTATGATTTCCAAGAAG          | GTAAAAGTCACAAATGCAGCACCTCGGCTCAGGCC           |
| <i>CELF1_Frag5</i>  | GGCCTGAGCCGAGGTGCTGCATTTGTGACTTTTAC        | GTCGTAACCTACAAAAGCAAACACTTGCTCAG              |
| <i>CELF1_Frag6</i>  | CTGAGCAAGTGTGTTTGTGTTTGTAAAGTTACGAC        | CTTCTGAGATGAGTTTTTGTTC                        |

---

**Luciferase  
Constructs**

---

| <b>Gene</b>  | <b>Forward primer (5'-3')</b>       | <b>Reverse primer (5'-3')</b>               |
|--------------|-------------------------------------|---------------------------------------------|
| <i>IRE5</i>  | AGTCACGCTAGCGCCCTCTCCCTCCC          | TACTGTATTGCTCATATGGGTATTATCGTGTTTTTCAAAGGAA |
| <i>CRLF1</i> | TGGCTGTCTAGAGCTGTAGGGGCTCAGGCCA     | AGGCTGGGGCCCTAAAAGGACTCTTTTGGAGGG           |
| <i>SNAI1</i> | TGGCTGTCTAGACCCTCGAGGCTCCCTCTT      | AGGCTGGGGCCCGAATATCAATAAACTGTACATATAACTATA  |
| <i>SSBP2</i> | TGGCTGTCTAGAATCCATTACCAAGTCTCCTCATG | AGGCTGGGGCCCGCTATGGTCTAAATGATTTGGGC         |

---

**Supplementary Table 2.** List of *Silencer Select* and other siRNAs used in the current study. Note each gene was silenced with 2 different siRNAs. NA, not applicable.

| <b>Gene</b>               | <b><i>Silencer Select</i> siRNA 1 Catalog # or Sense Sequence 1 (5'–3')</b> | <b><i>Silencer Select</i> siRNA 2 Catalog # or Sense Sequence 2 (5'–3')</b> |
|---------------------------|-----------------------------------------------------------------------------|-----------------------------------------------------------------------------|
| <i>CRLF1</i>              | s17673                                                                      | s17674                                                                      |
| <i>CYP4B1</i>             | s3856                                                                       | s3855                                                                       |
| <i>DUSP2</i>              | s4367                                                                       | s4366                                                                       |
| <i>EGR3</i>               | s4545                                                                       | s4544                                                                       |
| <i>FOSB</i>               | s230577                                                                     | s223612                                                                     |
| <i>GLIPR2</i>             | s45646                                                                      | s45644                                                                      |
| <i>JUNB</i>               | s7661                                                                       | s7662                                                                       |
| <i>PADI2</i>              | s22189                                                                      | s22187                                                                      |
| <i>PPARGC1A</i>           | s21393                                                                      | s21394                                                                      |
| <i>RHOB</i>               | s1575                                                                       | s1574                                                                       |
| <i>SEMA6D</i>             | s36854                                                                      | s36853                                                                      |
| <i>SNAI1</i>              | s13186                                                                      | s13187                                                                      |
| <i>SSBP2</i>              | s24244                                                                      | s24245                                                                      |
| <i>TICAM2</i>             | s51478                                                                      | s51476                                                                      |
| <i>CELF1</i>              | CCAUGAACGGCCUUUCAAAUUGGAU                                                   | GGACAGAUUGAAGAGUGCCGGAUUAU                                                  |
| <i>CELF2</i>              | CAGAGUAAAGGUUGUUGUUUCGUAA                                                   | GCUGGAGCCACUGUCGGAUUGAAUA                                                   |
| <i>MBNL1</i>              | ACGACGUCAUUAGCCAUAUUGUAUA                                                   | CACAGCCAACCAGAUACCCAUAUAUA                                                  |
| <i>MBNL2</i>              | GAGAUUAAUGGGAGGAACAAUUGA                                                    | GCGUUGCAUGAGGGAGAAAUGCAA                                                    |
| <i>Firefly Luciferase</i> | GCACUCUGAUUGACAAAUACGAUUU                                                   | NA                                                                          |

**Supplementary Table 3.** List of antibodies used in the current study for immunoblot, immunoprecipitation (IP), immunohistochemistry (IHC), and flow cytometry. NA, not applicable (cases where the antibodies were used either for IP, IHC (concentrations are mentioned in relevant Methods section), or flow cytometry).

| Name of Antibody                | Vendor                               | Catalog #      | Dilution  |
|---------------------------------|--------------------------------------|----------------|-----------|
| CELF1 (3B1)                     | EMD Millipore, Billerica, MA         | 05-621         | 1:1000    |
| CELF1 (1.T.9)                   | Santa Cruz Biotechnology, Dallas, TX | 56649          | NA (IP)   |
| CELF1 (3B1)                     | Abcam, Cambridge, MA                 | ab9549         | NA (IHC)  |
| CELF2 (1H2)                     | Kind gift from Dr. Thomas A Cooper   | NA             | 1:1000    |
| CRLF1                           | Sigma-Aldrich, St. Louis, MO         | SAB2100484     | 1:1000    |
| CYP4B1                          | ProteinTech, Chicago, IL             | 11771-1-AP     | 1:500     |
| DUSP2                           | Thermo Scientific, Rockford, IL      | PA5-28775      | 1:1000    |
| E-cadherin (24E10)              | Cell Signaling, Beverly, MA          | 3195           | 1:1000    |
| E-cadherin APC conjugate (67A4) | BioLegend, San Diego, CA             | 324108         | NA (Flow) |
| E-cadherin AF405 (67A4)         | Santa Cruz Biotechnology, Dallas, TX | sc-21791 AF405 | NA (Flow) |
| EGR3 (C-24)                     | Santa Cruz Biotechnology, Dallas, TX | sc-191         | 1:500     |
| FIBRONECTIN (IST-9)             | Abcam, Cambridge, MA                 | ab6328         | 1:1000    |
| FOSB (H-237)                    | Santa Cruz Biotechnology, Dallas, TX | sc-28213       | 1:500     |
| GLIPR2                          | Sigma-Aldrich, St. Louis, MO         | HPA029478      | 1:250     |
| JUNB (C37F9)                    | Cell Signaling, Beverly, MA          | 3753           | 1:1000    |
| HSP90                           | BD Biosciences, San Jose, CA         | 610419         | 1:5000    |
| MBNL1                           | LifeSpan Biosciences, Seattle, WA    | LS-B4372       | 1:1000    |
| MBNL2                           | Santa Cruz Biotechnology, Dallas, TX | Sc-136167      | 1:500     |
| N-cadherin                      | Cell Signaling, Beverly, MA          | 4061           | 1:1000    |
| PPARGC1A                        | Thermo Scientific, Rockford, IL      | PA5-22958      | 1:1000    |
| PADI2                           | ProteinTech, Chicago, IL             | 12110-1-AP     | 1:1000    |
| RHOB (C-5)                      | Santa Cruz Biotechnology, Dallas, TX | sc-8048        | 1:500     |
| SEMA6D                          | Sigma-Aldrich, St. Louis, MO         | AV49583        | 1:1000    |
| SNAI1                           | Bioss, Woburn, MA                    | bs-1371R       | 1:200     |
| SSBP2                           | LifeSpan Biosciences, Seattle, WA    | LS-B5585       | 1:500     |
| TICAM2                          | Thermo Scientific, Rockford, IL      | PA5-23396      | 1:250     |
| VIMENTIN (RV202)                | Abcam, Cambridge, MA                 | ab8978         | 1:1000    |
